# Supplementary material for: Review of recent treatment trends of laryngeal cancer in Poland: a population-based study
Source: PubMed Central journal article supplement — BMJ Open. 2021 Apr 30;11(4):e045308. doi: 10.1136/bmjopen-2020-045308 (PMC8098998; doi:10.1136/bmjopen-2020-045308), 2021-04-30
Supplement: bmjopen-2020-045308.draft_revisions.pdf [file bmjopen-2020-045308.draft_revisions.pdf]

# BMJ Open

BMJ Open is committed to open peer review. As part of this commitment we make the peer review history of every article we publish publicly available.

When an article is published we post the peer reviewers' comments and the authors' responses online. We also post the versions of the paper that were used during peer review. These are the versions that the peer review comments apply to.

The versions of the paper that follow are the versions that were submitted during the peer review process. They are not the versions of record or the final published versions. They should not be cited or distributed as the published version of this manuscript.

BMJ Open is an open access journal and the full, final, typeset and author-corrected version of record of the manuscript is available on our site with no access controls, subscription charges or pay-per-view fees (<http://bmjopen.bmj.com>).

If you have any questions on BMJ Open's open peer review process please email [info.bmjopen@bmj.com](mailto:info.bmjopen@bmj.com)

# BMJ Open

## A review of recent treatment trends of laryngeal cancer in Poland.

|                               |                                                                                                                                                                                                                                                                                                                                                                                                                                              |
|-------------------------------|----------------------------------------------------------------------------------------------------------------------------------------------------------------------------------------------------------------------------------------------------------------------------------------------------------------------------------------------------------------------------------------------------------------------------------------------|
| Journal:                      | <i>BMJ Open</i>                                                                                                                                                                                                                                                                                                                                                                                                                              |
| Manuscript ID                 | bmjopen-2020-045308                                                                                                                                                                                                                                                                                                                                                                                                                          |
| Article Type:                 | Original research                                                                                                                                                                                                                                                                                                                                                                                                                            |
| Date Submitted by the Author: | 11-Oct-2020                                                                                                                                                                                                                                                                                                                                                                                                                                  |
| Complete List of Authors:     | Rzepakowska, Anna; Medical University of Warsaw, Department of Otorhinolaryngology, Head and Neck Surgery<br>Żurek, Michał; Medical University of Warsaw, Students Scientific Research Group at the Department of Otorhinolaryngology Head and Neck Surgery; Polish Ministry of Health, Department of Analyses and Strategies<br>Niemczyk, Kazimierz; Medical University of Warsaw, Department of Otorhinolaryngology, Head and Neck Surgery |
| Keywords:                     | Head & neck surgery < OTOLARYNGOLOGY, Laryngology < OTOLARYNGOLOGY, Adult radiotherapy < RADIOTHERAPY, Head & neck tumours < ONCOLOGY                                                                                                                                                                                                                                                                                                        |
|                               |                                                                                                                                                                                                                                                                                                                                                                                                                                              |

SCHOLARONE™  
Manuscripts

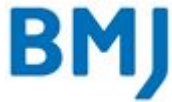

I, the Submitting Author has the right to grant and does grant on behalf of all authors of the Work (as defined in the below author licence), an exclusive licence and/or a non-exclusive licence for contributions from authors who are: i) UK Crown employees; ii) where BMJ has agreed a CC-BY licence shall apply, and/or iii) in accordance with the terms applicable for US Federal Government officers or employees acting as part of their official duties; on a worldwide, perpetual, irrevocable, royalty-free basis to BMJ Publishing Group Ltd ("BMJ") its licensees and where the relevant Journal is co-owned by BMJ to the co-owners of the Journal, to publish the Work in this journal and any other BMJ products and to exploit all rights, as set out in our [licence](#).

The Submitting Author accepts and understands that any supply made under these terms is made by BMJ to the Submitting Author unless you are acting as an employee on behalf of your employer or a postgraduate student of an affiliated institution which is paying any applicable article publishing charge ("APC") for Open Access articles. Where the Submitting Author wishes to make the Work available on an Open Access basis (and intends to pay the relevant APC), the terms of reuse of such Open Access shall be governed by a Creative Commons licence – details of these licences and which [Creative Commons](#) licence will apply to this Work are set out in our licence referred to above.

Other than as permitted in any relevant BMJ Author's Self Archiving Policies, I confirm this Work has not been accepted for publication elsewhere, is not being considered for publication elsewhere and does not duplicate material already published. I confirm all authors consent to publication of this Work and authorise the granting of this licence.

1  
2  
3 Title: A review of recent treatment trends of laryngeal cancer in Poland.  
4

5 Authors:

6  
7 Anna Rzepakowska MD, PhD<sup>1</sup> ORCID: 0000-0003-4012-8271  
8

9 Michał Żurek<sup>2,3</sup> ORCID: 0000-0001-5031-8007  
10

11 Kazimierz Niemczyk MD, Professor<sup>1</sup> ORCID: 0000-0003-3013-6403  
12

13 Affiliations:

14  
15 <sup>1</sup>Department of Otorhinolaryngology Head and Neck Surgery, Medical University of Warsaw  
16

17 <sup>2</sup>Students Scientific Research Group at the Department of Otorhinolaryngology Head and Neck  
18 Surgery, Medical University of Warsaw  
19

20 <sup>3</sup>Department of Analyses and Strategies, Polish Ministry of Health, Warsaw 00-952, Poland;  
21 m.zurek@mz.gov.pl  
22

23 Corresponding author:

24 Anna Rzepakowska  
25

26 Department of Otorhinolaryngology Head and Neck Surgery, Medical University of Warsaw  
27

28 ul. Banacha 1a  
29

30 02-097 Warsaw  
31

32 Phone: +48 225992716  
33

34 Fax: +48 225992523  
35

36 arzepakowska@wum.edu.pl  
37

38 ORCID ID: 0000-0003-4012-8271  
39  
40  
41  
42  
43  
44

45 Declarations:

46 Funding - not applicable

47 Conflicts of interest/Competing interests – none declared

48 Ethics approval - approved by the Ethical Review Board of Medical University of Warsaw

49 Consent to participate - not applicable

50 Consent for publication - not applicable

51 Availability of data and material – Extra data is available by emailing m.zurek@mz.gov.pl

52 Code availability - not applicable

53 Authors' contributions: Rzepakowska A. Conceptualization, methodology, writing, reviewing, editing  
54 and visualization. Żurek M: Methodology, data extraction, software and formal analysis, writing –  
55 draft, visualization. Niemczyk K. Reviewing, editing.  
56  
57  
58  
59  
60

1  
2  
3  
4  
5 Objectives: To investigate the utilization of different treatment modalities for patients with laryngeal  
6 cancer (LC) during last decade in Poland.  
7

8  
9 Setting: Retrospective population-based study  
10

11 Participants: Patients with LC treated between January 2009 and December 2018.  
12

13  
14 Primary and secondary outcome measures: The contemporary utilisation of treatment modalities of  
15 LC: surgery with intent of radical resection (total or partial laryngectomy), radiotherapy (RT) and  
16 chemoradiotherapy (CRT).  
17  
18

19  
20 Results: There was determined the overall number of 22 957 new diagnosis of LC from 2010 to 2018  
21 and confirmed the steady decrease in the incidence rate of LC in following years from 7.7 to 6.03. The  
22 mean age of patients with LC was raising by an average of 0.3832 of year per year. There was  
23 observed decrease in number of total laryngectomies in subsequent years (from 1122 in 2009 to 776 in  
24 2018). The number of procedures involving partial laryngeal resection was within stable ranges  
25 however the upward trend was observed separately for vocal cordectomy. There was established  
26 decreased involvement of surgery in LC treatment from 52.8% in 2009 to 24.3% in 2016 with the  
27 subsequent rise to 33.7% in 2018. The percentage of patients receiving RT increased from 23.8% in  
28 2009 to 42.1% in 2013 with the next decrease to 25.7% in 2018. The utilization of CRT in LC  
29 treatment was progressively increasing over analyzed years from 23.4% in 2009 reaching 40.6% in  
30 2018.  
31  
32

33  
34 Conclusions: The presented data revealed an increase in total number of organs preserving treatment  
35 modality with CRT in subsequent years with decreasing number of total laryngectomies in Polish  
36 patients with LC.  
37  
38

39  
40 Key words: laryngeal cancer, surgery, radiation, chemoradiotherapy  
41  
42

43  
44 Strengths and limitations of the study  
45  
46

- 47  
48
- 49 • This study is based on the national cohort of patients with laryngeal cancer.
  - 50 • It investigates the trends in treatment modalities during the last decade in the presence of the
  - 51 overall decline in outcomes.
  - 52 • Comparison of organs preserving treatment modality with chemoradiotherapy and surgical
  - 53 procedure of total laryngectomy was analyzed in subsequent years.
  - 54 • The percentage of transoral laryngeal procedures and open partial laryngectomies was
  - 55 analyzed.
  - 56
  - 57
  - 58
  - 59
  - 60

- Information concerning stage, locoregional control, metastatic disease, prior or concurrent cancer diagnosis, received radiation doses, data regarding CT administration with a number of cycles, specific agents, doses and long-term toxicities were not analyzed

## Introduction

Approximately 177,422 new cases of laryngeal cancer (LC) were diagnosed worldwide in 2018 according to the estimation of the International Agency for Research on Cancer and the forecasts indicate an increasing trend in the future. In 2017, population-based studies prepared by the Polish National Cancer Registry confirmed 2,224 new cases of LC and 1,580 deaths due to this type of cancer [2]. For comparison, the incidence and mortality due to LC reported in 2009 was 2,413 and 1,585 respectively [3]. Although statistics show decreasing rates for new diagnoses in our country, survival rates are not improving. Recommendations for primary treatment of LC differ depending on the stage of the disease and the site of cancer within the organ but also follow certain trends that promote organ preservation methods and depend on the availability of equipment. Historically, total laryngectomy with postoperative radiation was standard treatment for advanced stage (T3, T4) LC. However, the results of the Department of Veterans Affairs (VA) Laryngeal Cancer Study from 1991 and the Radiation Therapy Oncology Group (RTOG) 91-11 Study from 2003 modified the treatment paradigm focusing on conservative laryngeal therapy with chemoradiation (CRT), primarily in the United States and subsequently in Europe [4,5]. This approach has influenced the management of advanced LC and the number of primary laryngectomies, thus rendering the procedure rescue treatment. For T3 and T4 LC, current treatment protocols recommend concomitant or sequential radiotherapy (RT) with chemotherapy (CT) or total laryngectomy (TL). However, the radiological evidence of cartilage tumor infiltration is rather an indication for surgical resection [6]. In contrast, the early stages of LC (T1 and T2) should always be treated with an initial intent of organ preservation. The recommendations include surgical resection or primary RT and both methods give comparable oncological outcomes. Both these treatment modalities have evolved significantly over the last two decades. The prevalence and advances in transoral endoscopic surgical methods have replaced the open laryngeal surgery in primary treatment of T1 and T2 LC. The improvements in radiation techniques have also reduced the contribution of upfront RT treatment and provided high-quality design and delivery with target volume determination and the use of Intensity Modulated Radiation Therapy – IMRT [7]. This increases the therapeutic dose within the tumor while optimally sparing normal tissue adjacent to the tumor, e.g. the carotid arteries.

The purpose of this study was to investigate the trends in treatment modalities during the last decade in patients with LC in Poland, based on the national cohort of patients from the National Health Fund Database in order to evaluate the findings, compare them with global trends and assess the possibilities for improving survival rates.

## Materials and Methods

### Patients and Public Involvement statement

Patients were not involved in the study. All data used in the study proposals were de-identified and therefore the approval of the Institutional Review Board was waived. The study protocol is conformed to the principles embodied in the Declaration of Helsinki.

The study design was a retrospective population-based study. The data concerned patients with LC and their treatment procedures between January 2009 and December 2018 and was obtained from the National Database of Hospitalized Patients maintained by the National Health Fund (NFZ) of Poland [8]. The database compiles all data related to hospitalizations in public and private hospitals financed from public sources. The available database contains medical data (including diagnoses and procedures), identification numbers, dates of birth, area codes, and patient genders. Diagnoses are coded according to the International Classification of Diseases, 10th Revision (ICD-10), while surgical procedures are coded using the International Classification of Diseases, 9th Revision (ICD-9).

Patients with laryngeal carcinoma were identified according to the ICD-10 classification with the following codes: C32 - Malignant neoplasm of larynx, C32.0 – Malignant neoplasm of glottis, C32.1 - Malignant neoplasm of supraglottis, C32.2 - Malignant neoplasm of subglottis, C32.3 - Malignant neoplasm of laryngeal cartilage, C32.8 - Malignant neoplasm of overlapping sites of larynx, C32.9 - Malignant neoplasm of larynx, unspecified, C10.1 - Malignant neoplasm of anterior surface of epiglottis, and C13.1 - Malignant neoplasm of aryepiglottic fold, hypopharyngeal aspect. Procedures of interest included surgical resection of different extent according to the ICD-9 classification. All of the following procedures were included in the analysis: 30.1 Hemilaryngectomy, 30.2 Other partial laryngectomy, 30.21 Epiglottidectomy, 30.22 Vocal cordectomy, 30.23 Partial laryngectomy with reconstruction, 30.24 Laryngeal cartilage resection, 30.29 Other partial laryngectomy, 30.3 Complete laryngectomy, 30.31 En bloc laryngeal resection with thyroidectomy and tracheostomy, 30.32 Laryngopharyngectomy, 30.39 Other complete laryngectomy, 30.4 Radical laryngectomy (with radical neck dissection), 30.41 Radical laryngectomy (with radical neck dissection) and with thyroidectomy and tracheostomy, 30.49 Other radical laryngectomy, 30.0 Excision or destruction of lesion or tissue of larynx, 30.09 Other excision or destruction of lesion or tissue of larynx, 31.5 Local excision or destruction of larynx lesion or tissue of trachea. The RT and CT treatment was identified according to the ICD-10 classification (Z51.0 - antineoplastic radiation therapy and Z51.1 - antineoplastic chemotherapy).

1  
2  
3 Data on the population of Polish citizens were obtained from Statistics Poland (Główny Urząd  
4 Statystyczny) [9].  
5  
6

7 Taking into account different treatment modalities for LC, the following three options were analysed:  
8 surgery with intent of radical resection of LC (total or partial laryngectomy) including patients who  
9 received induction CRT or adjuvant RT/CRT; radiotherapy - including patients treated with RT alone  
10 or following induction CT; and chemoradiotherapy - including patients treated with CRT alone or  
11 following induction CT.  
12  
13  
14

#### 15 Statistical analysis

16  
17 Python 3.3.6 and Microsoft Excel 2016 were used to separate and analyze patient data from datasets.  
18 For quantitative variables, basic statistics (mean and standard deviation) were calculated. A linear  
19 regression model was used to analyze age variability of patients. The incidence rate is the number of  
20 new cases divided by 100,000 citizens.  
21  
22  
23  
24

#### 25 Results

26  
27 Considering the selected ICD-10 codes, the overall number of 61,571 hospitalizations related to LC  
28 from 2009 to 2018 in Poland was identified. The number of hospitalizations per year ranged from  
29 5,763 to 6,674 without any specified trend. The highest numbers of hospital stays were recorded for  
30 C32.0 (24,208) as well as C32.8 and C32.9 (13,068 and 17,268 respectively). Taking into account only  
31 primary hospitalization and the determination of the LC diagnosis, the overall number of 22,957 new  
32 diagnoses of LC from 2010 to 2018 was determined. This number could not be established for 2009  
33 year due to incomplete data in the register for previous years and the possibility of revaluation. A  
34 steady decrease in the incidence rate of LC was observed in the following years from 7.7 to 6.03  
35 (mean incidence rate 6.63). The trend was especially significant for male patients (the decrease in new  
36 diagnoses from 2,577 in 2010 to 1,987 in 2018) but was not as evident for female patients (from 388  
37 in 2010 to 330 in 2018). In contrast to the incidence rate, the mean age of patients with diagnosed LC  
38 significantly increased, growing on average by 0.3832 years per year. The trend was described by  
39 means of linear regression using the following formula:  $Y = 0.3832 * X + 61.345$ , where X is the  
40 serial number of the year (i.e. 2009 - 1, 2010 - 2 etc.). The regression model was very well fitted to the  
41 data and explained 99% ( $R^2 = 0.9909$ ) of age variability of patients. Demographic data on population  
42 revealed that about 70% of the LC patients were urban dwellers. The percentage of urban dwellers has  
43 slightly decreased over the last 10 years. Table 1.  
44  
45  
46  
47  
48  
49  
50  
51  
52  
53

54  
55 Table 1. The demographical characteristic of patients with new diagnosis of laryngeal cancer in Polish  
56 population from 2010 to 2018.  
57  
58  
59  
60



| <b>C32 patient s</b>               | <b>2010</b>    | <b>2011</b>    | <b>2012</b>    | <b>2013</b>    | <b>2014</b>    | <b>2015</b>    | <b>2016</b>    | <b>2017</b>    | <b>2018</b>    | <b>All</b>      |
|------------------------------------|----------------|----------------|----------------|----------------|----------------|----------------|----------------|----------------|----------------|-----------------|
| <b>No of patient s</b>             | 2965           | 2682           | 2653           | 2571           | 2520           | 2539           | 2360           | 2350           | 2317           | 22957           |
| <b>Populat ion (in thousa nds)</b> | 38517          | 38526          | 38534          | 38502          | 38484          | 38455          | 38427          | 38422          | 38413          | -               |
| <b>Inciden ce rate*</b>            | 7.70           | 6.96           | 6.88           | 6.68           | 6.55           | 6.60           | 6.14           | 6.12           | 6.03           | -               |
| <b>Age mean ± SE</b>               | 62.33 ± 9.43   | 62.72 ± 9.27   | 62.72 ± 9.19   | 63.42 ± 9.13   | 63.56 ± 8.87   | 64.1 ± 8.72    | 64.05 ± 8.99   | 64.49 ± 8.99   | 64.82 ± 8.97   | 63.58 ± 9.06    |
| <b>Women (%)</b>                   | 388 (13.09 %)  | 336 (12.53 %)  | 351 (13.23 %)  | 364 (14.16 %)  | 351 (13.93 %)  | 353 (13.9 %)   | 330 (13.98 %)  | 308 (13.11 %)  | 330 (14.24 %)  | 3111 (13.57 %)  |
| <b>Men (%)</b>                     | 2577 (86.91 %) | 2346 (87.47 %) | 2302 (86.77 %) | 2207 (85.84 %) | 2169 (86.07 %) | 2186 (86.10 %) | 2030 (86.02 %) | 2042 (86.89 %) | 1987 (85.76 %) | 19846 (86.43 %) |
| <b>Urban residen ce (%)</b>        | 2184 (73.66 %) | 1940 (72.33 %) | 1913 (72.11 %) | 1868 (72.66 %) | 1802 (71.51 %) | 1822 (71.76 %) | 1672 (70.85 %) | 1666 (70.89 %) | 1617 (69.79 %) | 16484 (71.73 %) |
| <b>Rural Resista nce (%)</b>       | 781 (26.34 %)  | 742 (27.67 %)  | 740 (27.89 %)  | 703 (27.34 %)  | 718 (28.49 %)  | 717 (28.24 %)  | 688 (29.15 %)  | 684 (29.11 %)  | 700 (30.21 %)  | 6473 (28.27 %)  |

\*Incidence rate = no of new diagnoses / 100 000 citizens

Analyzing the number of individual ICD-10 codes related to newly diagnosed LC, the highest number of patients with C32.0 (12,566) was identified. A relatively high number of C32.9 and C32 codes were found (5,686 and 1,118 respectively), however neither of them specifies laryngeal location or cancer stage. The new diagnosis of advanced cancer stages with cartilage infiltration C32.3 and extralaryngeal invasion C32.8 were recognized in 286 and 5,279 patients respectively. The calculated total hospitalization coefficient (number of hospitalizations / number of new diagnoses) for LC patients was 2.04 during the analyzed period. Patients with C32.9 were hospitalized most frequently, on average 2.74 hospitalizations.

The surgical procedures applied to laryngeal cancer treatment were categorized according to the extent of the resection. Procedures involving total laryngectomy (30.3, 30.31, 30.32, 30.39, 30.4, 30.41, 30.49) were performed in 9,562 patients during the 10-year period. The most common procedure was 30.32 – 5,234 (54.7%) and the second in order 30.39 – 2,454 (25.7%). The partial resection of the larynx (30.1, 30.2, 30.21, 30.22, 30.23, 30.24, 30.29) was applied 5,681 times as surgical treatment method over this time with significant advantage of the 30.22 procedure performed 3,182 times (56%). The overall number of procedures restricted to local excision or destruction of the laryngeal lesion (30.0, 30.09, 31.5) was 2,696. Table 2. The number of total laryngectomies decreased in subsequent analyzed years (from 1,122 in 2009 to 776 in 2018). Contrary to total laryngectomy, the number of procedures involving partial laryngeal resection was quite stable in total count with 561 procedures in 2009 and 579 in 2018. However, the upward trend was observed separately for 30.22 procedure (from 250 in 2009 to 393 in 2018) at the cost of a downward trend for other procedures of partial laryngeal resection. Figure 1.

Table 2. The number of surgical procedures according to ICD 9 codes applied to patients with laryngeal cancer during the 10 year period.

| ICD9/Year                                                             | 2009 | 2010 | 2011 | 2012 | 2013 | 2014 | 2015 | 2016 | 2017 | 2018 | Total       |
|-----------------------------------------------------------------------|------|------|------|------|------|------|------|------|------|------|-------------|
| <b>Procedures involving total laryngectomies</b>                      |      |      |      |      |      |      |      |      |      |      |             |
| 30.3 Complete laryngectomy                                            | 4    | 9    | 5    | 6    | 7    | 13   | 24   | 5    | -    | -    | <b>73</b>   |
| 30.31 En bloc laryngeal resection with thyroidectomy and tracheostomy | 85   | 70   | 39   | 79   | 48   | 33   | 27   | 20   | 15   | 14   | <b>430</b>  |
| 30.32 Laryngopharyngectomy                                            | 521  | 472  | 470  | 517  | 539  | 527  | 559  | 547  | 551  | 531  | <b>5234</b> |
| 30.39 Other complete laryngectomy                                     | 347  | 351  | 245  | 303  | 241  | 221  | 202  | 203  | 188  | 153  | <b>2454</b> |
| 30.4 Radical laryngectomy (with radical neck dissection)              | 23   | 17   | 8    | 3    | 4    | 6    | 7    | 1    | -    | -    | <b>69</b>   |
| 30.41 Radical laryngectomy (with radical neck dissection) and with    | 44   | 45   | 31   | 35   | 38   | 45   | 48   | 42   | 39   | 40   | <b>407</b>  |

|                                                                               |             |             |            |             |            |            |            |            |            |            |             |
|-------------------------------------------------------------------------------|-------------|-------------|------------|-------------|------------|------------|------------|------------|------------|------------|-------------|
| thyroidectomy and tracheostomy                                                |             |             |            |             |            |            |            |            |            |            |             |
| 30.49 Other radical laryngectomy                                              | 98          | 96          | 115        | 109         | 108        | 113        | 81         | 67         | 70         | 38         | <b>895</b>  |
| <b>Summary</b>                                                                | <b>1122</b> | <b>1060</b> | <b>913</b> | <b>1052</b> | <b>985</b> | <b>958</b> | <b>948</b> | <b>885</b> | <b>863</b> | <b>776</b> | <b>9562</b> |
| <b>Procedures involving partial resection of larynx</b>                       |             |             |            |             |            |            |            |            |            |            |             |
| 30.1 Hemilaryngectomy                                                         | 42          | 38          | 38         | 25          | 24         | 16         | 16         | 13         | 12         | 13         | <b>237</b>  |
| 30.2 Other partial laryngectomy                                               | -           | 3           | 2          | -           | -          | 1          | -          | -          | -          | -          | <b>6</b>    |
| 30.21 Epiglottidectomy                                                        | 15          | 11          | 7          | 10          | 10         | 6          | 10         | 5          | 1          | 6          | <b>81</b>   |
| 30.22 Vocal cordectomy                                                        | 250         | 276         | 262        | 307         | 249        | 309        | 358        | 369        | 409        | 393        | <b>3182</b> |
| 30.23 Partial laryngectomy with reconstruction                                | 133         | 115         | 94         | 108         | 134        | 93         | 80         | 65         | 57         | 56         | <b>935</b>  |
| 30.24 Laryngeal cartilage resection                                           | 1           | 1           | 1          | 1           | 1          |            | 3          |            | 2          | 2          | <b>12</b>   |
| 30.29 Other partial laryngectomy                                              | 120         | 110         | 120        | 128         | 126        | 152        | 140        | 122        | 101        | 109        | <b>1228</b> |
| <b>Summary</b>                                                                | <b>561</b>  | <b>554</b>  | <b>524</b> | <b>579</b>  | <b>544</b> | <b>577</b> | <b>607</b> | <b>574</b> | <b>582</b> | <b>579</b> | <b>5681</b> |
| <b>Procedures involving local destruction or excision of laryngeal tissue</b> |             |             |            |             |            |            |            |            |            |            |             |
| 30.0 Excision or destruction of lesion or tissue of larynx                    | 26          | 6           | 3          | 4           | 1          | 5          | 5          | -          | -          | -          | <b>50</b>   |
| 30.09 Other excision or destruction of lesion or tissue of larynx             | 161         | 167         | 165        | 176         | 151        | 165        | 210        | 167        | 123        | 186        | <b>1671</b> |
| 31.5 Local excision or destruction of larynx lesion or tissue of trachea      | 46          | 80          | 61         | 67          | 87         | 135        | 123        | 135        | 104        | 137        | <b>975</b>  |

|                |            |            |            |            |            |            |            |            |            |            |             |
|----------------|------------|------------|------------|------------|------------|------------|------------|------------|------------|------------|-------------|
| <b>Summary</b> | <b>233</b> | <b>253</b> | <b>229</b> | <b>247</b> | <b>239</b> | <b>305</b> | <b>338</b> | <b>302</b> | <b>227</b> | <b>323</b> | <b>2696</b> |
|----------------|------------|------------|------------|------------|------------|------------|------------|------------|------------|------------|-------------|

Considering the surgical procedures with the intent of radical resection of LC (total or partial laryngectomy), they were applied 15,243 times as a treatment modality over the analyzed period. Among those cases the additional treatment of RT or CRT was performed in 4,250 patients. RT alone or with induction CT was applied over the same period for 16,308 patients, while concurrent or subsequent CRT was administered for treatment in 15,032 patients. There was observed a downward trend for surgical methods of LC treatment from 52.8% in 2009 to 24.3% in 2016 with the subsequent rise to 33.7% in 2018. The percentage of patients receiving RT was increasing from 23.8% in 2009 to 42.1% in 2013 and next it decreased to the level of 25.7% in 2018. The utilization of CRT in LC treatment was progressively increasing over analyzed years from 23.4% in 2009 reaching 40.6% in 2018. Table 3. Figure 2.

Table 3. The numbers of different treatment modalities for laryngeal cancer including surgery, radiotherapy (RT) and chemoradiotherapy (CRT) in 2009-2018 with the percentage share in following years.

| <b>TREATEMENT \ YEAR</b> | <b>2009</b> | <b>2010</b> | <b>2011</b> | <b>2012</b> | <b>2013</b> | <b>2014</b> | <b>2015</b> | <b>2016</b> | <b>2017</b> | <b>2018</b> | <b>Total</b> |
|--------------------------|-------------|-------------|-------------|-------------|-------------|-------------|-------------|-------------|-------------|-------------|--------------|
| <b>SURGERY</b>           | 1344        | 1278        | 1023        | 1109        | 998         | 1044        | 1073        | 1040        | 1005        | 1042        | 10956        |
| <b>SURGERY_RT/CRT</b>    | 339         | 336         | 414         | 522         | 531         | 491         | 482         | 419         | 440         | 313         | 4287         |
| <b>RT</b>                | 720         | 850         | 1181        | 1508        | 1929        | 2070        | 2095        | 2043        | 1568        | 960         | 14924        |
| <b>CT_RT</b>             | 39          | 60          | 92          | 110         | 180         | 191         | 223         | 261         | 152         | 76          | 1384         |
| <b>CT_CRT</b>            | 76          | 118         | 174         | 219         | 240         | 301         | 392         | 477         | 352         | 304         | 2653         |
| <b>CRT</b>               | 671         | 806         | 990         | 1102        | 1125        | 1401        | 1622        | 1766        | 1568        | 1328        | 12379        |
| <b>SURGERY</b>           | 1683        | 1614        | 1437        | 1631        | 1529        | 1535        | 1555        | 1459        | 1445        | 1355        | 15243        |
| <b>RT</b>                | 759         | 910         | 1273        | 1618        | 2109        | 2261        | 2318        | 2304        | 1720        | 1036        | 16308        |
| <b>CRT</b>               | 747         | 924         | 1164        | 1321        | 1365        | 1702        | 2014        | 2243        | 1920        | 1632        | 15032        |

|                    |           |           |           |           |           |           |           |           |           |           |           |
|--------------------|-----------|-----------|-----------|-----------|-----------|-----------|-----------|-----------|-----------|-----------|-----------|
| <b>SURGERY (%)</b> | 52.7<br>8 | 46.8<br>1 | 37.0<br>9 | 35.6<br>9 | 30.5<br>6 | 27.9<br>2 | 26.4<br>1 | 24.2<br>9 | 28.4<br>2 | 33.6<br>8 | 32.7<br>2 |
| <b>RT (%)</b>      | 23.8<br>0 | 26.3<br>9 | 32.8<br>6 | 35.4<br>0 | 42.1<br>5 | 41.1<br>2 | 39.3<br>7 | 38.3<br>6 | 33.8<br>2 | 25.7<br>5 | 35.0<br>1 |
| <b>CRT (%)</b>     | 23.4<br>2 | 26.8<br>0 | 30.0<br>5 | 28.9<br>1 | 27.2<br>8 | 30.9<br>6 | 34.2<br>1 | 37.3<br>5 | 37.7<br>6 | 40.5<br>7 | 32.2<br>7 |

SURGERY = SURGERY + SURGERY\_RT/CRT; RT = RT + CT\_RT; CRT = CT\_CRT + CRT

## Discussion

The population-based analyses in the majority of developed countries show a decreasing incidence of LC, but paradoxically declining outcomes can be observed over the recent decade. This contradicts trends in survival for other cancer types. It was speculated that the overall decline in outcomes may reflect the consistent rise in larynx-preserving treatment methods with CRT, especially for T4 tumours or partial laryngectomies for T3 [10,11]. The extensive surgical treatment provided satisfactory survival results, however, it induced the deprivation of laryngeal phonation and permanent cervical stoma. The trend of organ-preserving treatment made the selection of treatment for the same tumor far more complex and the fact that it involved opposite strategies, has risen many controversies. The new directions are inevitable, however, their efficiency should be monitored.

The national cohort studies analyzing the contemporary utilisation of treatment modalities of LC confronted to population-based studies are not so commonly performed. However, those expertise can update current trends in practice patterns and assess how the practice affects survival outcomes.

The presented study used the national cohort of patients who were diagnosed and treated between 2009 and 2018 in Poland to measure utilisation trends of LC treatment over that period. Initially, our data confirmed the decrease in the number of patients with LC observed worldwide. In the following years, a steady decrease was observed in the incidence rate from 7.77 / 100,000 in 2009 and 6.03 / 100,000 in 2018. The reports from Germany, the Netherlands, the USA and the Scandinavian countries present such downward trends, however the incidence rates in those countries are lower than in Poland [12-14]. Another aspect to consider after our analysis is the gradual increase in the average age of patients with laryngeal cancer. We observed that the average age of the patients was almost 4 years higher in 2018 compared to 2009. This trend may result from changes in the structure of Polish society but also more effective methods of diagnosis and treatment in the last years. Similar results were presented in the study of Reizenstein et al. [15] or Peller et al. [16], although the increase of average age in German or Swedish patients was not as significant as in Polish ones. Considering the inhabitancy of LC patients almost 72% of them lived in cities, however the percentage decreased over

1  
2  
3 10 years. The results of the study by Włodarczyk et al. confirm the higher percentage of regular  
4 smokers in urban areas (30,3%) than in the countryside (25.4%) [17].  
5  
6

7 Regarding the surgical treatment methods, a downward trend in total laryngectomies in the subsequent  
8 analysed years (from 1,122 in 2009 down to 776 in 2018) could be observed and the declining trend  
9 was not only dependent on the decreasing incidence. Contrary to a total laryngectomy, the number of  
10 procedures involving partial laryngeal resection remained stable. However an upward trend was  
11 observed for vocal cordectomy, performed as transoral laryngeal microsurgery. Hence the open partial  
12 laryngectomies rate has decreased. Summarising the overall number of surgical approaches in LC  
13 treatment, we observed a temporary downward trend from 52.8% in 2009 to 24.3% in 2016 and  
14 subsequent rise to 33.7% in 2018. Contrary to surgery the percentage of patients receiving RT  
15 increased from 23.8% in 2009 to 42.1% in 2013 and then there was a decrease to the level of 25.7% in  
16 2018. The utilisation of CRT in LC treatment was increasing progressively over the analysed period  
17 from 23.4% in 2009 to 40.6% in 2018. A quite comparable utility of treatment modalities in LC,  
18 additionally covering the earlier period is presented by Patel et al. in their analysis of the US National  
19 Cancer Database [18]. Their study involved 8,703 patients with stage III/IV LC treated between 2003  
20 and 2011 and revealed the decline in total laryngectomies between 2003 and 2007 from 36.0% to  
21 24.6%; in 2008, the utilisation of total laryngectomies increased to 27.8%, and remained within the  
22 range of 26.6% to 31.0% [18]. The use of open partial laryngectomies decreased from a peak  
23 incidence of 17.1% in 2003 and remained stable in the range of 9.0% to 10.4% up to 2011. The data  
24 presented show an evident rise in larynx-preserving CRT from 47% in 2003 to 61.5% in 2011 [18].  
25 The review of Garcia Lorenzo et al. presents another similar comparison of treatment options offered  
26 to patients with T3 and T4 laryngeal cancer over the last 30 years, however from single institution in  
27 Spain [19]. They found out the surgery and RT were progressively substituted by CRT in  
28 chronological periods of 1985-1994, 1995-2004 and 2005-2014. The participation of surgery in  
29 treatment of LC patients declined from 62.5% to 52.2% and 50.5% respectively, while the percentages  
30 for RT were 33.5%, 39.7% and 16.8%, respectively. The contribution of CRT has risen from 0% to  
31 8.1% and 32.7%, respectively. Moreover, the authors showed no significant differences in survival  
32 depending on treatment for T3 cancer patients, however, there was a significantly higher cancer-  
33 specific survival for T4 cancer patients treated surgically. The results of their report revealed the  
34 highest survival for patients from 1995 -2004 period and the lowest survival for those treated in the  
35 period of 2005–2014 [19]. The results of a recent meta-analysis by Tang et al. that include controlled  
36 trials and compare long-term survival, support total laryngectomy for patients with T4 LC and deny  
37 the advantage of primary organ preservation treatment for both T3 and T4 LC in increasing the overall  
38 survival rate [20]. Therefore, a treatment modality for advanced stages of LC should be addressed  
39 especially for further prospective studies. The other reason responsible for declining outcomes of LC  
40 that needs to be considered is the increasing age of patients at the primary diagnosis. With the shift of  
41  
42  
43  
44  
45  
46  
47  
48  
49  
50  
51  
52  
53  
54  
55  
56  
57  
58  
59  
60

1  
2  
3 the average age, the presence of other comorbidities is also inevitable and may not only influence the  
4 survival but make some patients susceptible to specific therapy options.  
5  
6

7 Regarding the treatment modality for T1 stage of LC in retrospective reports, there is a relative  
8 equivalence of RT and transoral endoscopic microsurgery and the rates of local control exceed 90%  
9 [7]. However for T2 LC the rates decrease significantly and range between 70 and 80%, regardless of  
10 treatment approach [21]. Since the oncological benefits are comparable, both methods are verified in  
11 terms of voice and swallow outcomes, costs, side effects, time consumption, future options. The  
12 technological progress enabled the development of both methods in recent decades. The progress in  
13 visualization techniques and widespread adoption of laser techniques in laryngeal microsurgery  
14 contribute to increased numbers of CO2 laser endoscopic laryngeal resections of cancer, especially  
15 vocal cordectomies. We did not find the data directly analysing the increase in the utility of transoral  
16 procedures performed with the laser compared to cold instruments and open partial laryngectomies in  
17 glottic cancer. However, Mendelsohn et al. identified a substantial annual growth rates and correct  
18 growth rates in original studies covering glottic cancer and laryngeal cancer in the time following the  
19 European Laryngological Society classification of cordectomies in 2000 [22]. Unfortunately, the ICD-  
20 9 classification does not include specification of the 30.22 procedure regarding involvement of laser  
21 versus cold instruments. However according to worldwide trends, we assume that the increase of vocal  
22 cordectomies in Poland is inevitably correlated with widespread CO2 laser endoscopic laryngeal  
23 microsurgery. The main advantages of laser-assisted LC treatment in comparison to RT are the short  
24 time of therapy, decreased costs, the possibility of revising endoscopic resection in case of persistence  
25 or recurrence and avoidance of the long-term side effects of RT.  
26  
27  
28  
29  
30  
31  
32  
33  
34  
35  
36  
37

38 In parallel to laser cordectomies, the new radiation techniques, including IMRT and stereotactic  
39 radiation therapy, are verified in studies dedicated to early stages of LC with analysis of sufficient  
40 doses (total dose and a single dose/fraction) and addition of sensitising CT [23].  
41  
42

43 There are limitations to our analysis, resulting mainly from the fact that the National Foundation  
44 Database is unfortunately not combined with the National Cancer Registry. Therefore the  
45 identification of LC stage with TNM was not possible due to access to ICD-10 diagnosis solely.  
46 Information concerning locoregional control, metastatic disease, prior or concurrent cancer diagnosis,  
47 received radiation doses, data regarding CT administration with a number of cycles, specific agents,  
48 doses and long-term toxicities is also missing.  
49  
50  
51  
52  
53

#### 54 Conclusions

55  
56 The presented data revealed an increase in the total number of organ-preserving treatment modality  
57 with CRT in the subsequent years and a decreasing number of total laryngectomies in Polish patients  
58 with LC. The progressing age of LC onset in Polish population may contribute to declining outcomes.  
59  
60

The multicenter prospective randomised studies comparing treatment modalities should be planned to verify the oncological outcomes and to refer them to patients' needs and cost-effectiveness.

#### Declarations:

Funding - This paper has been prepared within the project Maps of Health Needs – Database of Systemic and Implementation Analyses. The project is co-financed by the European Union from the European Social Fund under the Operational Program Knowledge Education Development and it is being carried out by the Analyses and Strategies Department of the Polish Ministry of Health. Grant number: POWR 05.02.00-00.0149/15-01.

Conflicts of interest/Competing interests – none declared

Ethics approval - not applicable

Consent to participate - not applicable

Consent for publication - not applicable

Availability of data and material – Extra data is available by emailing [m.zurek@mz.gov.pl](mailto:m.zurek@mz.gov.pl)

Code availability - not applicable

Authors' contributions: Rzepakowska A. Conceptualization, methodology, writing, reviewing, editing and visualization. Żurek M: Methodology, data extraction, software and formal analysis, writing – draft, visualization. Niemczyk K. Reviewing, editing.

#### References

1. Global Cancer Observatory, <http://globocan.iarc.fr/Default.aspx>.
2. Didkowska J, Wojciechowska U, Czaderny K, Olasek P, Ciuba A.: Nowotwory złośliwe w Polsce w 2017 roku, Polish National Cancer Registry, [http://onkologia.org.pl/wp-content/uploads/Nowotwory\\_2017.pdf](http://onkologia.org.pl/wp-content/uploads/Nowotwory_2017.pdf)
3. Didkowska J, Wojciechowska U, Zatoński W.: Nowotwory złośliwe w Polsce w 2009 roku, Polish National Cancer Registry [http://onkologia.org.pl/wp-content/uploads/Nowotwory\\_2009.pdf](http://onkologia.org.pl/wp-content/uploads/Nowotwory_2009.pdf)
4. Department of Veterans Affairs Laryngeal Cancer Study Group. Induction chemotherapy plus radiation compared with surgery plus radiation in patients with advanced laryngeal cancer. *N Engl J Med* 1991;324:1685–90.
5. Forastiere AA, Goepfert H, Maor M, et al. Concurrent chemotherapy and radiotherapy for organ preservation in advanced laryngeal cancer. *N Engl J Med* 2003;349:2091–8.
6. Wick CC, Rezaee RP, Wang T, Garcia-Jarchow AM, Zender CA, Gibson M, Yao M, Lavertu P. Use of concurrent chemoradiation in advanced staged (T4) laryngeal cancer. *Am J Otolaryngol.* 2017;38(1):72-76.
7. Baird BJ, Sung CK, Beadle BM, Divi V. Treatment of early-stage laryngeal cancer: A comparison of treatment options. *Oral Oncol.* 2018 Dec;87:8-16.
8. The National Health Fund Data. 2018. Available online: <http://www.nfz.gov.pl> (accessed on 20.02.2020).
9. Central Statistical Office of Poland Data. Available online: <http://www.stat.gov.pl> (accessed on 20.02.2020).
10. Olsen KD. Reexamining the treatment of advanced laryngeal cancer. *Head Neck.*2010;32:1–7.



11. Cosetti M, Yu GP, Schantz SP. Five-year survival rates and time trends of laryngeal cancer in the US population. *Arch Otolaryngol Head Neck Surg*. 2008;134:370-379.
12. Netherlands Cancer Registry [Internet]. Laryngeal cancer statistics (2014). [http://www.dutchcancerfigures.nl/selecties/Dataset\\_3/img54d89aa75777a](http://www.dutchcancerfigures.nl/selecties/Dataset_3/img54d89aa75777a)
13. SEER Cancer Statistics Factsheets: Larynx Cancer. National Cancer Institute. Bethesda, MD. <http://seer.cancer.gov/statfacts/html/larynx.html>
14. NORDCAN: Cancer incidence and mortality in the Nordic countries 2014. <http://www-dep.iarc.fr/NORDCAN/english/frame.asp>
15. Reizenstein JA, Bergström SN, Holmberg L, Linder A, Ekman S, Blomquist E, Löden B, Holmqvist M, Hellström K, Nilsson CO, Brattström D, Bergqvist M. Impact of age at diagnosis on prognosis and treatment in laryngeal cancer. *Head Neck*. 2010;32:1062-8.
16. Peller M, Katalinic A, Wollenberg B, Teudt IU, Meyer JE. Epidemiology of laryngeal carcinoma in Germany, 1998-2011. *Eur Arch Otorhinolaryngol*. 2016;273:1481-7.
17. Włodarczyk A, Raciborski F, Opoczyńska D, Samoliński B; GATS PWG. Daily tobacco smoking patterns in rural and urban areas of Poland--the results of the GATS study. *Ann Agric Environ Med*. 2013;20(3):588-94
18. Patel SA, Qureshi MM, Dyer MA, Jalisi S, Grillone G, Truong MT. Comparing surgical and nonsurgical larynx-preserving treatments with total laryngectomy for locally advanced laryngeal cancer. *Cancer*. 2019;1;125(19):3367-3377.
19. García Lorenzo J, Montoro Martínez V, Rigo Quera A, Codina Aroca A, López Vilas M, Quer Agustí M, León Vintó X. Modifications in the treatment of advanced laryngeal cancer throughout the last 30 years. *Eur Arch Otorhinolaryngol*. 2017 Sep;274(9):3449-3455.
20. Tang ZX, Gong JL, Wang YH, Li ZH, He Y, Liu YX, Zhou XH. Efficacy comparison between primary total laryngectomy and nonsurgical organ-preservation strategies in treatment of advanced stage laryngeal cancer: A meta-analysis. *Medicine (Baltimore)*. 2018 May;97(21):e10625.
21. Warner L, Lee K, Homer JJ. Transoral laser microsurgery versus radiotherapy for T2 glottic squamous cell carcinoma: a systematic review of local control outcomes. *Clin Otolaryngol* 2017; 42(3): 629–36.
22. Mendelsohn AH, Remacle MJ. Vocal Fold Cancer Transoral Laser Microsurgery Following European Laryngological Society Laser Cordectomy Classification. *Front Oncol*. 2018 Jun 22;8:231.
23. Stokes WA, Abbott D, Phan A, Raben D, Lanning RM, Karam SD. Patterns of Care for Patients With Early-Stage Glottic Cancer Undergoing Definitive Radiation Therapy: A National Cancer Database Analysis. *Int J Radiat Oncol Biol Phys*. 2017;98(5):1014-1021.

#### Figure legends:

Figure 1. Different surgical procedures involving total laryngectomy, partial resection of the larynx or local destruction or excision applied to patients with laryngeal cancer in 2009-2018.

Figure 2. The proportional utilization of surgery, radiotherapy (RT) and chemoradiotherapy (CRT) in treatment of laryngeal cancer in Poland in 2009-2018.

1  
2  
3  
4  
5  
6  
7  
8  
9  
10  
11  
12  
13  
14  
15  
16  
17  
18  
19  
20  
21  
22  
23  
24  
25  
26  
27  
28  
29  
30  
31  
32  
33  
34  
35  
36  
37  
38  
39  
40  
41  
42  
43  
44  
45  
46  
47  
48  
49  
50  
51  
52  
53  
54  
55  
56  
57  
58  
59  
60

For peer review only

1  
2  
3  
4  
5  
6  
7  
8  
9  
10  
11  
12  
13  
14  
15  
16  
17  
18  
19  
20  
21  
22  
23  
24  
25  
26  
27  
28  
29  
30  
31  
32  
33  
34  
35  
36  
37  
38  
39  
40  
41  
42  
43  
44  
45  
46  
47  
48  
49  
50  
51  
52  
53  
54  
55  
56  
57  
58  
59  
60

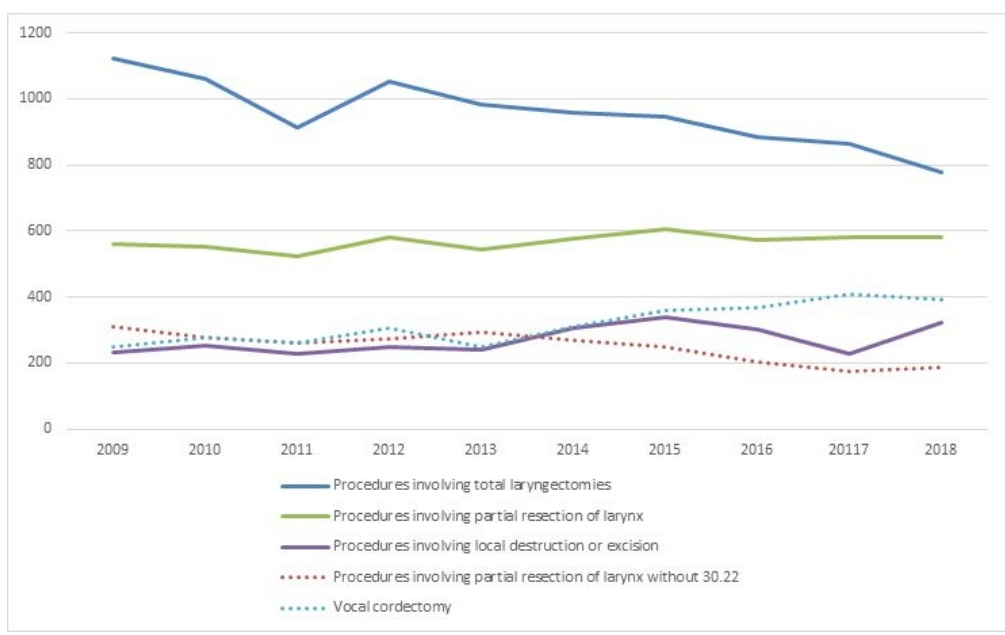

Figure 1. Different surgical procedures involving total laryngectomy, partial resection of the larynx or local destruction or excision applied to patients with laryngeal cancer in 2009-2018.

260x161mm (72 x 72 DPI)

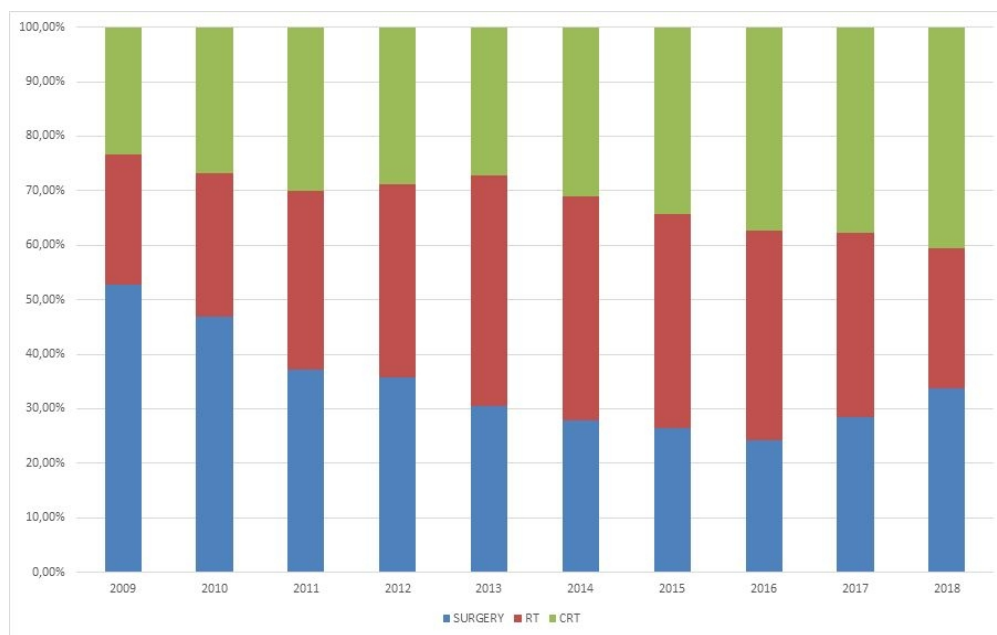

Figure 2. The proportional utilization of surgery, radiotherapy (RT) and chemoradiotherapy (CRT) in treatment of laryngeal cancer in Poland in 2009-2018.

319x201mm (72 x 72 DPI)

# BMJ Open

## A review of recent treatment trends of laryngeal cancer in Poland: population-based study.

|                                 |                                                                                                                                                                                                                                                                                                                                                                                                                                              |
|---------------------------------|----------------------------------------------------------------------------------------------------------------------------------------------------------------------------------------------------------------------------------------------------------------------------------------------------------------------------------------------------------------------------------------------------------------------------------------------|
| Journal:                        | <i>BMJ Open</i>                                                                                                                                                                                                                                                                                                                                                                                                                              |
| Manuscript ID                   | bmjopen-2020-045308.R1                                                                                                                                                                                                                                                                                                                                                                                                                       |
| Article Type:                   | Original research                                                                                                                                                                                                                                                                                                                                                                                                                            |
| Date Submitted by the Author:   | 07-Feb-2021                                                                                                                                                                                                                                                                                                                                                                                                                                  |
| Complete List of Authors:       | Rzepakowska, Anna; Medical University of Warsaw, Department of Otorhinolaryngology, Head and Neck Surgery<br>Żurek, Michał; Medical University of Warsaw, Students Scientific Research Group at the Department of Otorhinolaryngology Head and Neck Surgery; Polish Ministry of Health, Department of Analyses and Strategies<br>Niemczyk, Kazimierz; Medical University of Warsaw, Department of Otorhinolaryngology, Head and Neck Surgery |
| <b>Primary Subject Heading</b>: | Ear, nose and throat/otolaryngology                                                                                                                                                                                                                                                                                                                                                                                                          |
| Secondary Subject Heading:      | Oncology                                                                                                                                                                                                                                                                                                                                                                                                                                     |
| Keywords:                       | Head & neck surgery < OTOLARYNGOLOGY, Laryngology < OTOLARYNGOLOGY, Adult radiotherapy < RADIOTHERAPY, Head & neck tumours < ONCOLOGY                                                                                                                                                                                                                                                                                                        |
|                                 |                                                                                                                                                                                                                                                                                                                                                                                                                                              |

SCHOLARONE™  
Manuscripts



I, the Submitting Author has the right to grant and does grant on behalf of all authors of the Work (as defined in the below author licence), an exclusive licence and/or a non-exclusive licence for contributions from authors who are: i) UK Crown employees; ii) where BMJ has agreed a CC-BY licence shall apply, and/or iii) in accordance with the terms applicable for US Federal Government officers or employees acting as part of their official duties; on a worldwide, perpetual, irrevocable, royalty-free basis to BMJ Publishing Group Ltd ("BMJ") its licensees and where the relevant Journal is co-owned by BMJ to the co-owners of the Journal, to publish the Work in this journal and any other BMJ products and to exploit all rights, as set out in our [licence](#).

The Submitting Author accepts and understands that any supply made under these terms is made by BMJ to the Submitting Author unless you are acting as an employee on behalf of your employer or a postgraduate student of an affiliated institution which is paying any applicable article publishing charge ("APC") for Open Access articles. Where the Submitting Author wishes to make the Work available on an Open Access basis (and intends to pay the relevant APC), the terms of reuse of such Open Access shall be governed by a Creative Commons licence – details of these licences and which [Creative Commons](#) licence will apply to this Work are set out in our licence referred to above.

Other than as permitted in any relevant BMJ Author's Self Archiving Policies, I confirm this Work has not been accepted for publication elsewhere, is not being considered for publication elsewhere and does not duplicate material already published. I confirm all authors consent to publication of this Work and authorise the granting of this licence.

1  
2  
3 Title: A review of recent treatment trends of laryngeal cancer in Poland: population-based study.  
4

5 Authors:

6  
7 Anna Rzepakowska MD, PhD<sup>1</sup> ORCID: 0000-0003-4012-8271  
8

9 Michał Żurek<sup>2,3</sup> ORCID: 0000-0001-5031-8007  
10

11 Kazimierz Niemczyk MD, Professor<sup>1</sup> ORCID: 0000-0003-3013-6403  
12

13 Affiliations:

14  
15 <sup>1</sup>Department of Otorhinolaryngology Head and Neck Surgery, Medical University of Warsaw  
16

17 <sup>2</sup> Doctoral School, Medical University of Poland, 02-091 Warsaw, Poland  
18

19 <sup>3</sup>Department of Analyses and Strategies, Polish Ministry of Health, Warsaw 00-952, Poland;  
20 m.zurek@mz.gov.pl  
21

22 Corresponding author:

23 Anna Rzepakowska  
24

25 Department of Otorhinolaryngology Head and Neck Surgery, Medical University of Warsaw  
26

27 ul. Banacha 1a  
28

29 02-097 Warsaw  
30

31 Phone: +48 225992716  
32

33 Fax: +48 225992523  
34

35 arzepakowska@wum.edu.pl  
36

37 ORCID ID: 0000-0003-4012-8271  
38  
39  
40  
41  
42  
43  
44  
45  
46  
47  
48  
49  
50  
51  
52  
53  
54  
55  
56  
57  
58  
59  
60

1  
2  
3  
4  
5 Objectives: To investigate the utilization of different treatment modalities for patients with laryngeal  
6 cancer (LC) during last decade in Poland.  
7

8  
9 Setting: Retrospective population-based study  
10

11 Participants: Patients with LC treated between January 2009 and December 2018.  
12

13  
14 Primary and secondary outcome measures: The contemporary utilisation of treatment modalities of  
15 LC: surgery with intent of radical resection (total or partial laryngectomy), radiotherapy (RT) and  
16 chemoradiotherapy (CRT).  
17  
18

19  
20 Results: There was determined the overall number of 22 957 new diagnosis of LC from 2010 to 2018  
21 and confirmed the steady decrease in the incidence rate of LC in following years from 7.7 to 6.03. The  
22 mean age of patients with LC was raising by an average of 0.3832 of year per year. There was  
23 observed decrease in number of total laryngectomies in subsequent years (from 1122 in 2009 to 776 in  
24 2018). The number of procedures involving partial laryngeal resection was within stable ranges  
25 however the upward trend was observed separately for vocal cordectomy. There was established  
26 decreased involvement of surgery in LC treatment from 52.8% in 2009 to 24.3% in 2016 with the  
27 subsequent rise to 33.7% in 2018. The percentage of patients receiving RT increased from 23.8% in  
28 2009 to 42.1% in 2013 with the next decrease to 25.7% in 2018. The utilization of CRT in LC  
29 treatment was progressively increasing over analyzed years from 23.4% in 2009 reaching 40.6% in  
30 2018.  
31  
32

33  
34 Conclusions: The presented data revealed an increase in total number of organs preserving treatment  
35 modality with CRT in subsequent years with decreasing number of total laryngectomies in Polish  
36 patients with LC.  
37  
38

39  
40 Key words: laryngeal cancer, surgery, radiation, chemoradiotherapy  
41  
42

43  
44 Strengths and limitations of the study  
45  
46

- 47  
48
- 49 • This study is based on the national cohort of patients with laryngeal cancer.
  - 50 • It investigates the trends in treatment modalities during the last decade in the presence of the
  - 51 overall decline in outcomes.
  - 52 • Comparison of organs preserving treatment modality with chemoradiotherapy and surgical
  - 53 procedure of total laryngectomy was analyzed in subsequent years.
  - 54 • The percentage of transoral laryngeal procedures and open partial laryngectomies was
  - 55 analyzed.
  - 56
  - 57
  - 58
  - 59
  - 60



- Information concerning stage, locoregional control, metastatic disease, prior or concurrent cancer diagnosis, received radiation doses, data regarding CT administration with a number of cycles, specific agents, doses and long-term toxicities were not analyzed

## Introduction

Approximately 177,422 new cases of laryngeal cancer (LC) were diagnosed worldwide in 2018 according to the estimation of the International Agency for Research on Cancer and the forecasts indicate an increasing trend in the future [1]. In 2017, population-based studies prepared by the Polish National Cancer Registry confirmed 2,224 new cases of LC and 1,580 deaths due to this type of cancer [2]. For comparison, the incidence and mortality due to LC reported in 2009 was 2,413 and 1,585 respectively [3]. Although statistics show decreasing rates for new diagnoses in our country, survival rates are not improving. Recommendations for primary treatment of LC differ depending on the stage of the disease and the site of cancer within the organ but also follow certain trends that promote organ preservation methods and depend on the availability of equipment. Historically, total laryngectomy with postoperative radiation was standard treatment for advanced stage (T3, T4) LC. However, the results of the Department of Veterans Affairs (VA) Laryngeal Cancer Study from 1991 and the Radiation Therapy Oncology Group (RTOG) 91-11 Study from 2003 modified the treatment paradigm focusing on conservative laryngeal therapy with chemoradiation (CRT), primarily in the United States and subsequently in Europe [4,5]. This approach has influenced the management of advanced LC and the number of primary laryngectomies, thus rendering the procedure rescue treatment. For T3 and T4 LC, current treatment protocols recommend concomitant or sequential radiotherapy (RT) with chemotherapy (CT) or total laryngectomy (TL). However, the radiological evidence of cartilage tumor infiltration is rather an indication for surgical resection [6]. In contrast, the early stages of LC (T1 and T2) should always be treated with an initial intent of organ preservation. The recommendations include surgical resection or primary RT and both methods give comparable oncological outcomes. Both these treatment modalities have evolved significantly over the last two decades. The prevalence and advances in transoral endoscopic surgical methods have replaced the open laryngeal surgery in primary treatment of T1 and T2 LC. The improvements in radiation techniques have also reduced the contribution of upfront RT treatment and provided high-quality design and delivery with target volume determination and the use of Intensity Modulated Radiation Therapy – IMRT [7]. This increases the therapeutic dose within the tumor while optimally sparing normal tissue adjacent to the tumor, e.g. the carotid arteries.

The purpose of this study was to investigate the trends in treatment modalities during the last decade in patients with LC in Poland, based on the national cohort of patients from the National Health Fund Database in order to evaluate the findings, compare them with global trends and assess the possibilities for improving survival rates.

## Materials and Methods

### Patients and Public Involvement statement

All data used in the study proposals were de-identified and therefore the approval of the Institutional Review Board was waived.

The study design was a retrospective population-based study. The data concerned patients with LC and their treatment procedures between January 2009 and December 2018 and was obtained from the National Database of Hospitalized Patients maintained by the National Health Fund (NFZ) of Poland [8]. The database compiles all data related to hospitalizations in public and private hospitals financed from public sources. The available database contains medical data (including diagnoses and procedures), identification numbers, dates of birth, area codes, and patient genders. Diagnoses are coded according to the International Classification of Diseases, 10th Revision (ICD-10), while surgical procedures are coded using the International Classification of Diseases, 9th Revision (ICD-9).

Patients with laryngeal carcinoma were identified according to the ICD-10 classification with the following codes: C32 - Malignant neoplasm of larynx, C32.0 – Malignant neoplasm of glottis, C32.1 - Malignant neoplasm of supraglottis, C32.2 - Malignant neoplasm of subglottis, C32.3 - Malignant neoplasm of laryngeal cartilage, C32.8 - Malignant neoplasm of overlapping sites of larynx, C32.9 - Malignant neoplasm of larynx, unspecified, C10.1 - Malignant neoplasm of anterior surface of epiglottis, and C13.1 - Malignant neoplasm of aryepiglottic fold, hypopharyngeal aspect. Procedures of interest included surgical resection of different extent according to the ICD-9 classification. All of the following procedures were included in the analysis: 30.1 Hemilaryngectomy, 30.2 Other partial laryngectomy, 30.21 Epiglottidectomy, 30.22 Vocal cordectomy, 30.23 Partial laryngectomy with reconstruction, 30.24 Laryngeal cartilage resection, 30.29 Other partial laryngectomy, 30.3 Complete laryngectomy, 30.31 En bloc laryngeal resection with thyroidectomy and tracheostomy, 30.32 Laryngopharyngectomy, 30.39 Other complete laryngectomy, 30.4 Radical laryngectomy (with radical neck dissection), 30.41 Radical laryngectomy (with radical neck dissection) and with thyroidectomy and tracheostomy, 30.49 Other radical laryngectomy, 30.0 Excision or destruction of lesion or tissue of larynx, 30.09 Other excision or destruction of lesion or tissue of larynx, 31.5 Local excision or destruction of larynx lesion or tissue of trachea. The RT and CT treatment was identified according to the ICD-10 classification (Z51.0 - antineoplastic radiation therapy and Z51.1 - antineoplastic chemotherapy).

Data on the population of Polish citizens were obtained from Statistics Poland (Główny Urząd Statystyczny) [9].

Taking into account different treatment modalities for LC, the following three options were analysed: surgery with intent of radical resection of LC (total or partial laryngectomy) including patients who

received induction CRT or adjuvant RT/CRT; radiotherapy - including patients treated with RT alone or following induction CT; and chemoradiotherapy - including patients treated with CRT alone or following induction CT.

### Statistical analysis

Python 3.3.6 and Microsoft Excel 2016 were used to separate and analyze patient data from datasets. For quantitative variables, basic statistics (mean and standard deviation) were calculated. A linear regression model was used to analyze age variability of patients. The incidence rate is the number of new cases divided by 100,000 citizens.

### Results

Considering the selected ICD-10 codes, the overall number of 61,571 hospitalizations related to LC from 2009 to 2018 in Poland was identified. The number of hospitalizations per year ranged from 5,763 to 6,674 without any specified trend. The highest numbers of hospital stays were recorded for C32.0 - Malignant neoplasm of glottis (24,208) as well as C32.8 - Malignant neoplasm of overlapping sites of larynx and C32.9 - Malignant neoplasm of larynx, unspecified (13,068 and 17,268 respectively). Taking into account only primary hospitalization and the determination of the LC diagnosis, the overall number of 22,957 new diagnoses of LC from 2010 to 2018 was determined. This number could not be established for 2009 year due to incomplete data in the register for previous years and the possibility of revaluation. A steady decrease in the incidence rate of LC was observed in the following years from 7.7 to 6.03 (mean incidence rate 6.63; 95% CI: 6.23-7.03). The trend was especially significant for male patients (the decrease in new diagnoses from 2,577 in 2010 to 1,987 in 2018) but was not as evident for female patients (from 388 in 2010 to 330 in 2018). In contrast to the incidence rate, the mean age of patients with diagnosed LC significantly increased, growing on average by 0.3832 (95% CI: 0.3381-0.4283) years per year. The trend was described by means of linear regression using the following formula:  $Y = 0.3832 * X + 61.345$ , where X is the serial number of the year (i.e. 2009 - 1, 2010 - 2 etc.). The regression model was very well fitted to the data and explained 99% ( $R^2 = 0.9909$ ) of age variability of patients. Demographic data on population revealed that about 70% of the LC patients were urban dwellers. The percentage of urban dwellers has slightly decreased over the last 10 years. Table 1.

Table 1. The demographical characteristic of patients with new diagnosis of laryngeal cancer in Polish population from 2010 to 2018.

| <b>C32 patient s</b> | <b>2010</b> | <b>2011</b> | <b>2012</b> | <b>2013</b> | <b>2014</b> | <b>2015</b> | <b>2016</b> | <b>2017</b> | <b>2018</b> | <b>All</b> |
|----------------------|-------------|-------------|-------------|-------------|-------------|-------------|-------------|-------------|-------------|------------|
|                      |             |             |             |             |             |             |             |             |             |            |

|                                     |                  |                  |                  |                  |                  |                 |                  |                  |                  |                  |
|-------------------------------------|------------------|------------------|------------------|------------------|------------------|-----------------|------------------|------------------|------------------|------------------|
| <b>No of patients</b>               | 2965             | 2682             | 2653             | 2571             | 2520             | 2539            | 2360             | 2350             | 2317             | 22957            |
| <b>Population (in thousands)</b>    | 38517            | 38526            | 38534            | 38502            | 38484            | 38455           | 38427            | 38422            | 38413            | -                |
| <b>Incidence rate*</b>              | 7.70             | 6.96             | 6.88             | 6.68             | 6.55             | 6.60            | 6.14             | 6.12             | 6.03             | -                |
| <b>Age mean <math>\pm</math> SE</b> | 62.33 $\pm$ 9.43 | 62.72 $\pm$ 9.27 | 62.72 $\pm$ 9.19 | 63.42 $\pm$ 9.13 | 63.56 $\pm$ 8.87 | 64.1 $\pm$ 8.72 | 64.05 $\pm$ 8.99 | 64.49 $\pm$ 8.99 | 64.82 $\pm$ 8.97 | 63.58 $\pm$ 9.06 |
| <b>Women (%)</b>                    | 388 (13.09 %)    | 336 (12.53 %)    | 351 (13.23 %)    | 364 (14.16 %)    | 351 (13.93 %)    | 353 (13.9 %)    | 330 (13.98 %)    | 308 (13.11 %)    | 330 (14.24 %)    | 3111 (13.57 %)   |
| <b>Men (%)</b>                      | 2577 (86.91 %)   | 2346 (87.47 %)   | 2302 (86.77 %)   | 2207 (85.84 %)   | 2169 (86.07 %)   | 2186 (86.10 %)  | 2030 (86.02 %)   | 2042 (86.89 %)   | 1987 (85.76 %)   | 19846 (86.43 %)  |
| <b>Urban residence (%)</b>          | 2184 (73.66 %)   | 1940 (72.33 %)   | 1913 (72.11 %)   | 1868 (72.66 %)   | 1802 (71.51 %)   | 1822 (71.76 %)  | 1672 (70.85 %)   | 1666 (70.89 %)   | 1617 (69.79 %)   | 16484 (71.73 %)  |
| <b>Rural Residence (%)</b>          | 781 (26.34 %)    | 742 (27.67 %)    | 740 (27.89 %)    | 703 (27.34 %)    | 718 (28.49 %)    | 717 (28.24 %)   | 688 (29.15 %)    | 684 (29.11 %)    | 700 (30.21 %)    | 6473 (28.27 %)   |

\*Incidence rate = no of all C32 new diagnoses / 100 000 citizens

Analyzing the number of individual ICD-10 codes related to newly diagnosed LC, the highest number of patients with C32.0 - Malignant neoplasm of glottis (12,566) was identified. A relatively high number of C32.9 - Malignant neoplasm of larynx, unspecified and C32 - Malignant neoplasm of larynx were found (5,686 and 1,118 respectively), however neither of them specifies laryngeal location or cancer stage. The new diagnosis of advanced cancer stages with cartilage infiltration C32.3 and extralaryngeal invasion C32.8 were recognized in 286 and 5,279 patients respectively. The calculated total hospitalization coefficient (number of hospitalizations / number of new diagnoses) for LC patients was 2.04 during the analyzed period. Patients with C32.9 were hospitalized most frequently, on average 2.74 hospitalizations.

The surgical procedures applied to laryngeal cancer treatment were categorized according to the extent of the resection. Procedures involving total laryngectomy (30.3, 30.31, 30.32, 30.39, 30.4, 30.41, 30.49) were performed in 9,562 patients during the 10-year period. The most common procedure was 30.32 Laryngopharyngectomy– 5,234 (54.7%) and the second in order 30.39 Other complete laryngectomy – 2,454 (25.7%). The partial resection of the larynx (30.1, 30.2, 30.21, 30.22, 30.23, 30.24, 30.29) was applied 5,681 times as surgical treatment method over this time with significant advantage of the 30.22 Vocal cordectomy procedure performed 3,182 times (56%). The overall number of procedures restricted to local excision or destruction of the laryngeal lesion (30.0, 30.09, 31.5) was 2,696. Table 2. The number of total laryngectomies decreased in subsequent analyzed years (from 1,122 in 2009 to 776 in 2018). Contrary to total laryngectomy, the number of procedures involving partial laryngeal resection was quite stable in total count with 561 procedures in 2009 and 579 in 2018. However, the upward trend was observed separately for 30.22 Vocal cordectomy procedure (from 250 in 2009 to 393 in 2018) at the cost of a downward trend for other procedures of partial laryngeal resection. Figure 1.

Table 2. The number of surgical procedures applied to patients with laryngeal cancer with relation to extension of resection during the 10 year period.

| Year/No (n)                                                                     | 2009 | 2010 | 2011 | 2012 | 2013 | 2014 | 2015 | 2016 | 2017 | 2018 | Total |
|---------------------------------------------------------------------------------|------|------|------|------|------|------|------|------|------|------|-------|
| Surgical procedures involving total laryngectomy                                |      |      |      |      |      |      |      |      |      |      |       |
| (n)                                                                             | 1122 | 1060 | 913  | 1052 | 985  | 958  | 948  | 885  | 863  | 776  | 9562  |
| Surgical procedures involving partial resection of larynx                       |      |      |      |      |      |      |      |      |      |      |       |
| (n)                                                                             | 561  | 554  | 524  | 579  | 544  | 577  | 607  | 574  | 582  | 579  | 5681  |
| Surgical procedures involving local destruction or excision of laryngeal tissue |      |      |      |      |      |      |      |      |      |      |       |
| (n)                                                                             | 233  | 253  | 229  | 247  | 239  | 305  | 338  | 302  | 227  | 323  | 2696  |

Supplementary file 1. Table 2A The number of surgical procedures according to ICD 9 codes applied to patients with laryngeal cancer during the 10 year period.

Considering the surgical procedures with the intent of radical resection of LC (total or partial laryngectomy), they were applied 15,243 times as a treatment modality over the analyzed period. Among those cases the additional treatment of RT or CRT was performed in 4,250 patients. RT alone or with induction CT was applied over the same period for 16,308 patients, while concurrent or subsequent CRT was administered for treatment in 15,032 patients. There was observed a downward

trend for surgical methods of LC treatment from 52.8% in 2009 to 24.3% in 2016 with the subsequent rise to 33.7% in 2018. The percentage of patients receiving RT was increasing from 23.8% in 2009 to 42.1% in 2013 and next it decreased to the level of 25.7% in 2018. The utilization of CRT in LC treatment was progressively increasing over analyzed years from 23.4% in 2009 reaching 40.6% in 2018. Table 3. Figure 2.

Table 3. The numbers of different treatment modalities for laryngeal cancer including surgery, radiotherapy (RT) and chemoradiotherapy (CRT) in 2009-2018 with the percentage share in following years.

| TRETEMENT \ YEAR      | 2009  | 2010  | 2011  | 2012  | 2013  | 2014  | 2015  | 2016  | 2017  | 2018  | Total |
|-----------------------|-------|-------|-------|-------|-------|-------|-------|-------|-------|-------|-------|
| <b>SURGERY</b>        | 1344  | 1278  | 1023  | 1109  | 998   | 1044  | 1073  | 1040  | 1005  | 1042  | 10956 |
| <b>SURGERY_RT/CRT</b> | 339   | 336   | 414   | 522   | 531   | 491   | 482   | 419   | 440   | 313   | 4287  |
| <b>RT</b>             | 720   | 850   | 1181  | 1508  | 1929  | 2070  | 2095  | 2043  | 1568  | 960   | 14924 |
| <b>CT_RT</b>          | 39    | 60    | 92    | 110   | 180   | 191   | 223   | 261   | 152   | 76    | 1384  |
| <b>CT_CRT</b>         | 76    | 118   | 174   | 219   | 240   | 301   | 392   | 477   | 352   | 304   | 2653  |
| <b>CRT</b>            | 671   | 806   | 990   | 1102  | 1125  | 1401  | 1622  | 1766  | 1568  | 1328  | 12379 |
| <b>SURGERY</b>        | 1683  | 1614  | 1437  | 1631  | 1529  | 1535  | 1555  | 1459  | 1445  | 1355  | 15243 |
| <b>RT</b>             | 759   | 910   | 1273  | 1618  | 2109  | 2261  | 2318  | 2304  | 1720  | 1036  | 16308 |
| <b>CRT</b>            | 747   | 924   | 1164  | 1321  | 1365  | 1702  | 2014  | 2243  | 1920  | 1632  | 15032 |
| <b>SURGERY (%)</b>    | 52.78 | 46.81 | 37.09 | 35.69 | 30.56 | 27.92 | 26.41 | 24.29 | 28.42 | 33.68 | 32.72 |
| <b>RT (%)</b>         | 23.80 | 26.39 | 32.86 | 35.40 | 42.15 | 41.12 | 39.37 | 38.36 | 33.82 | 25.75 | 35.01 |
| <b>CRT (%)</b>        | 23.42 | 26.80 | 30.05 | 28.91 | 27.28 | 30.96 | 34.21 | 37.35 | 37.76 | 40.57 | 32.27 |

SURGERY = SURGERY + SURGERY\_RT/CRT; RT = RT + CT\_RT; CRT = CT\_CRT + CRT

## Discussion

The population-based analyses in the majority of developed countries show a decreasing incidence of LC, but paradoxically declining outcomes can be observed over the recent decade. This contradicts trends in survival for other cancer types. It was speculated that the overall decline in outcomes may reflect the consistent rise in larynx-preserving treatment methods with CRT, especially for T4 tumours or partial laryngectomies for T3 [10,11]. The extensive surgical treatment provided satisfactory survival results, however, it induced the deprivation of laryngeal phonation and permanent cervical stoma. The trend of organ-preserving treatment made the selection of treatment for the same tumor far more complex and the fact that it involved opposite strategies, has risen many controversies. The new directions are inevitable, however, their efficiency should be monitored.

The national cohort studies analyzing the contemporary utilisation of treatment modalities of LC confronted to population-based studies are not so commonly performed. However, those expertise can update current trends in practice patterns and assess how the practice affects survival outcomes.

The presented study used the national cohort of patients who were diagnosed and treated between 2009 and 2018 in Poland to measure utilisation trends of LC treatment over that period. Initially, our data confirmed the decrease in the number of patients with LC observed worldwide. In the following years, a steady decrease was observed in the incidence rate from 7.77 / 100,000 in 2009 and 6.03 / 100,000 in 2018. The reports from Germany, the Netherlands, the USA and the Scandinavian countries present such downward trends, however the incidence rates in those countries are lower than in Poland [12-14]. Another aspect to consider after our analysis is the gradual increase in the average age of patients with laryngeal cancer. We observed that the average age of the patients was almost 4 years higher in 2018 compared to 2009. This trend may result from changes in the structure of Polish society but also more effective methods of diagnosis and treatment in the last years. Similar results were presented in the study of Reizenstein et al. [15] or Peller et al. [16], although the increase of average age in German or Swedish patients was not as significant as in Polish ones. Considering the inhabitancy of LC patients almost 72% of them lived in cities, however the percentage decreased over 10 years. The results of the study by Włodarczyk et al. confirm the higher percentage of regular smokers in urban areas (30,3%) than in the countryside (25.4%) [17].

Regarding the surgical treatment methods, a downward trend in total laryngectomies in the subsequent analysed years (from 1,122 in 2009 down to 776 in 2018) could be observed and the declining trend was not only dependent on the decreasing incidence. Contrary to a total laryngectomy, the number of procedures involving partial laryngeal resection remained stable. However an upward trend was observed for vocal cordectomy, performed as transoral laryngeal microsurgery. Hence the open partial laryngectomies rate has decreased. Summarising the overall number of surgical approaches in LC treatment, we observed a temporary downward trend from 52.8% in 2009 to 24.3% in 2016 and

1  
2  
3 subsequent rise to 33.7% in 2018. Contrary to surgery the percentage of patients receiving RT  
4 increased from 23.8% in 2009 to 42.1% in 2013 and then there was a decrease to the level of 25.7% in  
5 2018. The utilisation of CRT in LC treatment was increasing progressively over the analysed period  
6 from 23.4% in 2009 to 40.6% in 2018. A quite comparable utility of treatment modalities in LC,  
7 additionally covering the earlier period is presented by Patel et al. in their analysis of the US National  
8 Cancer Database [18]. Their study involved 8,703 patients with stage III/IV LC treated between 2003  
9 and 2011 and revealed the decline in total laryngectomies between 2003 and 2007 from 36.0% to  
10 24.6%; in 2008, the utilisation of total laryngectomies increased to 27.8%, and remained within the  
11 range of 26.6% to 31.0% [18]. The use of open partial laryngectomies decreased from a peak  
12 incidence of 17.1% in 2003 and remained stable in the range of 9.0% to 10.4% up to 2011. The data  
13 presented show an evident rise in larynx-preserving CRT from 47% in 2003 to 61.5% in 2011 [18].  
14 The review of Garcia Lorenzo et al. presents another similar comparison of treatment options offered  
15 to patients with T3 and T4 laryngeal cancer over the last 30 years, however from single institution in  
16 Spain [19]. They found out the surgery and RT were progressively substituted by CRT in  
17 chronological periods of 1985-1994, 1995-2004 and 2005-2014. The participation of surgery in  
18 treatment of LC patients declined from 62.5% to 52.2% and 50.5% respectively, while the percentages  
19 for RT were 33.5%, 39.7% and 16.8%, respectively. The contribution of CRT has risen from 0% to  
20 8.1% and 32.7%, respectively. Moreover, the authors showed no significant differences in survival  
21 depending on treatment for T3 cancer patients, however, there was a significantly higher cancer-  
22 specific survival for T4 cancer patients treated surgically. The results of their report revealed the  
23 highest survival for patients from 1995 -2004 period and the lowest survival for those treated in the  
24 period of 2005–2014 [19]. The results of a recent meta-analysis by Tang et al. that include controlled  
25 trials and compare long-term survival, support total laryngectomy for patients with T4 LC and deny  
26 the advantage of primary organ preservation treatment for both T3 and T4 LC in increasing the overall  
27 survival rate [20]. Therefore, a treatment modality for advanced stages of LC should be addressed  
28 especially for further prospective studies. The other reason responsible for declining outcomes of LC  
29 that needs to be considered is the increasing age of patients at the primary diagnosis. With the shift of  
30 the average age, the presence of other comorbidities is also inevitable and may not only influence the  
31 survival but make some patients susceptible to specific therapy options.  
32  
33  
34  
35  
36  
37  
38  
39  
40  
41  
42  
43  
44  
45  
46  
47  
48

49 Regarding the treatment modality for T1 stage of LC in retrospective reports, there is a relative  
50 equivalence of RT and transoral endoscopic microsurgery and the rates of local control exceed 90%  
51 [7]. However for T2 LC the rates decrease significantly and range between 70 and 80%, regardless of  
52 treatment approach [21]. Since the oncological benefits are comparable, both methods are verified in  
53 terms of voice and swallow outcomes, costs, side effects, time consumption, future options. The  
54 technological progress enabled the development of both methods in recent decades. The progress in  
55 visualization techniques and widespread adoption of laser techniques in laryngeal microsurgery  
56  
57  
58  
59  
60



1  
2  
3 contribute to increased numbers of CO<sub>2</sub> laser endoscopic laryngeal resections of cancer, especially  
4 vocal cordectomies. We did not find the data directly analysing the increase in the utility of transoral  
5 procedures performed with the laser compared to cold instruments and open partial laryngectomies in  
6 glottic cancer. However, Mendelsohn et al. identified a substantial annual growth rates and correct  
7 growth rates in original studies covering glottic cancer and laryngeal cancer in the time following the  
8 European Laryngological Society classification of cordectomies in 2000 [22]. Unfortunately, the ICD-  
9 9 classification does not include specification of the 30.22 procedure regarding involvement of laser  
10 versus cold instruments. However according to worldwide trends, we assume that the increase of vocal  
11 cordectomies in Poland is inevitably correlated with widespread CO<sub>2</sub> laser endoscopic laryngeal  
12 microsurgery. The main advantages of laser-assisted LC treatment in comparison to RT are the short  
13 time of therapy, decreased costs, the possibility of revising endoscopic resection in case of persistence  
14 or recurrence and avoidance of the long-term side effects of RT.  
15  
16  
17  
18  
19  
20  
21  
22

23 In parallel to laser cordectomies, the new radiation techniques, including IMRT and stereotactic  
24 radiation therapy, are verified in studies dedicated to early stages of LC with analysis of sufficient  
25 doses (total dose and a single dose/fraction) and addition of sensitising CT [23].  
26  
27

28 There are limitations to our analysis, resulting mainly from the fact that the National Foundation  
29 Database is unfortunately not combined with the National Cancer Registry. Therefore the  
30 identification of LC stage with TNM was not possible due to access to ICD-10 diagnosis solely.  
31 Information concerning locoregional control, metastatic disease, prior or concurrent cancer diagnosis,  
32 received radiation doses, data regarding CT administration with a number of cycles, specific agents,  
33 doses and long-term toxicities is also missing.  
34  
35  
36  
37  
38

### 39 Conclusions

40  
41 The presented data revealed an increase in the total number of organ-preserving treatment modality  
42 with CRT in the subsequent years and a decreasing number of total laryngectomies in Polish patients  
43 with LC. The progressing age of LC onset in Polish population may contribute to declining outcomes.  
44 The multicenter prospective randomised studies comparing treatment modalities should be planned to  
45 verify the oncological outcomes and to refer them to patients' needs and cost-effectiveness.  
46  
47  
48  
49  
50  
51  
52

### 53 Declarations:

54 Authors' contributions: Rzepakowska A. Conceptualization, methodology, writing, reviewing, editing  
55 and visualization. Żurek M: Methodology, data extraction, software and formal analysis, writing –  
56 draft, visualization. Niemczyk K. Reviewing, editing.  
57

58 Conflicts of interest/Competing interests – none declared  
59  
60

1  
2  
3 Funding - This paper has been prepared within the project Maps of Health Needs – Database of  
4 Systemic and Implementation Analyses. The project is co-financed by the European Union from the  
5 European Social Fund under the Operational Program Knowledge Education Development and it is  
6 being carried out by the Analyses and Strategies Department of the Polish Ministry of Health. Grant  
7 number: POWR 05.02.00-00.0149/15-01.  
8  
9

10 Data sharing statement: Deidentified individual participant data that underlie the results are reported in  
11 the article (text, tables, figures and supplementary file).  
12  
13

## 14 15 16 17 18 19 20 21 22 23 24 25 26 27 28 29 30 31 32 33 34 35 36 37 38 39 40 41 42 43 44 45 46 47 48 49 50 51 52 53 54 55 56 57 58 59 60

### References

1. Global Cancer Observatory, <http://globocan.iarc.fr/Default.aspx>.
2. Didkowska J, Wojciechowska U, Czaderny K, Olasek P, Ciuba A.: Nowotwory złośliwe w Polsce w 2017 roku, Polish National Cancer Registry, [http://onkologia.org.pl/wp-content/uploads/Nowotwory\\_2017.pdf](http://onkologia.org.pl/wp-content/uploads/Nowotwory_2017.pdf)
3. Didkowska J, Wojciechowska U, Zatoński W.: Nowotwory złośliwe w Polsce w 2009 roku, Polish National Cancer Registry [http://onkologia.org.pl/wp-content/uploads/Nowotwory\\_2009.pdf](http://onkologia.org.pl/wp-content/uploads/Nowotwory_2009.pdf)
4. Department of Veterans Affairs Laryngeal Cancer Study Group. Induction chemotherapy plus radiation compared with surgery plus radiation in patients with advanced laryngeal cancer. *N Engl J Med* 1991;324:1685–90.
5. Forastiere AA, Goepfert H, Maor M, et al. Concurrent chemotherapy and radiotherapy for organ preservation in advanced laryngeal cancer. *N Engl J Med* 2003;349:2091–8.
6. Wick CC, Rezaee RP, Wang T, Garcia-Jarchow AM, Zender CA, Gibson M, Yao M, Lavertu P. Use of concurrent chemoradiation in advanced staged (T4) laryngeal cancer. *Am J Otolaryngol.* 2017;38(1):72-76.
7. Baird BJ, Sung CK, Beadle BM, Divi V. Treatment of early-stage laryngeal cancer: A comparison of treatment options. *Oral Oncol.* 2018 Dec;87:8-16.
8. The National Health Fund Data. 2018. Available online: <http://www.nfz.gov.pl> (accessed on 20.02.2020).
9. Central Statistical Office of Poland Data. Available online: <http://www.stat.gov.pl> (accessed on 20.02.2020).
10. Olsen KD. Reexamining the treatment of advanced laryngeal cancer. *Head Neck.*2010;32:1–7.
11. Cosetti M, Yu GP, Schantz SP. Five-year survival rates and time trends of laryngeal cancer in the US population. *Arch Otolaryngol Head Neck Surg.* 2008;134:370-379.
12. Netherlands Cancer Registry [Internet]. Laryngeal cancer statistics (2014). [http://www.dutchcancerfigures.nl/selecties/Dataset\\_3/img54d89aa75777a](http://www.dutchcancerfigures.nl/selecties/Dataset_3/img54d89aa75777a)
13. SEER Cancer Statistics Factsheets: Larynx Cancer. National Cancer Institute. Bethesda, MD. <http://seer.cancer.gov/statfacts/html/larynx.html>
14. NORDCAN: Cancer incidence and mortality in the Nordic countries 2014. <http://www-dep.iarc.fr/NORDCAN/english/frame.asp>
15. Reizenstein JA, Bergström SN, Holmberg L, Linder A, Ekman S, Blomquist E, Löden B, Holmqvist M, Hellström K, Nilsson CO, Brattström D, Bergqvist M. Impact of age at diagnosis on prognosis and treatment in laryngeal cancer. *Head Neck.* 2010;32:1062-8.
16. Peller M, Katalinic A, Wollenberg B, Teudt IU, Meyer JE. Epidemiology of laryngeal carcinoma in Germany, 1998-2011. *Eur Arch Otorhinolaryngol.* 2016;273:1481-7.

17. Włodarczyk A, Raciborski F, Opoczyńska D, Samoliński B; GATS PWG. Daily tobacco smoking patterns in rural and urban areas of Poland--the results of the GATS study. *Ann Agric Environ Med*. 2013;20(3):588-94
18. Patel SA, Qureshi MM, Dyer MA, Jalisi S, Grillone G, Truong MT. Comparing surgical and nonsurgical larynx-preserving treatments with total laryngectomy for locally advanced laryngeal cancer. *Cancer*. 2019;1;125(19):3367-3377.
19. García Lorenzo J, Montoro Martínez V, Rigo Quera A, Codina Aroca A, López Vilas M, Quer Agustí M, León Vintro X. Modifications in the treatment of advanced laryngeal cancer throughout the last 30 years. *Eur Arch Otorhinolaryngol*. 2017 Sep;274(9):3449-3455.
20. Tang ZX, Gong JL, Wang YH, Li ZH, He Y, Liu YX, Zhou XH. Efficacy comparison between primary total laryngectomy and nonsurgical organ-preservation strategies in treatment of advanced stage laryngeal cancer: A meta-analysis. *Medicine (Baltimore)*. 2018 May;97(21):e10625.
21. Warner L, Lee K, Homer JJ. Transoral laser microsurgery versus radiotherapy for T2 glottic squamous cell carcinoma: a systematic review of local control outcomes. *Clin Otolaryngol* 2017; 42(3): 629–36.
22. Mendelsohn AH, Remacle MJ. Vocal Fold Cancer Transoral Laser Microsurgery Following European Laryngological Society Laser Cordectomy Classification. *Front Oncol*. 2018 Jun 22;8:231.
23. Stokes WA, Abbott D, Phan A, Raben D, Lanning RM, Karam SD. Patterns of Care for Patients With Early-Stage Glottic Cancer Undergoing Definitive Radiation Therapy: A National Cancer Database Analysis. *Int J Radiat Oncol Biol Phys*. 2017;98(5):1014-1021.

Figure legends:

Figure 1. Different surgical procedures involving total laryngectomy, partial resection of the larynx or local destruction or excision applied to patients with laryngeal cancer in 2009-2018.

Figure 2. The proportional utilization of surgery, radiotherapy (RT) and chemoradiotherapy (CRT) in treatment of laryngeal cancer in Poland in 2009-2018.

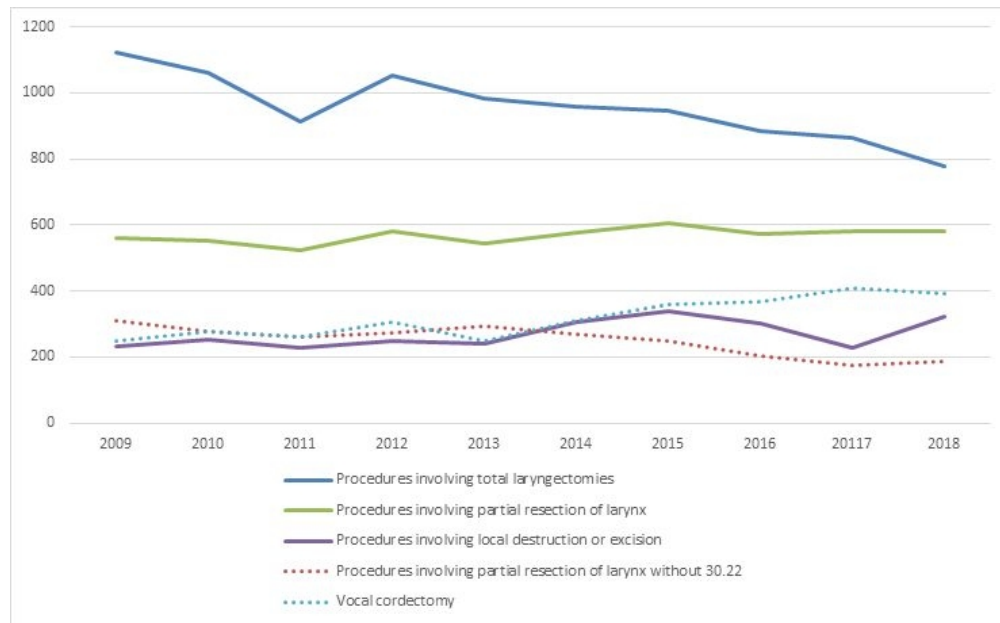

Figure 1. Different surgical procedures involving total laryngectomy, partial resection of the larynx or local destruction or excision applied to patients with laryngeal cancer in 2009-2018.

260x161mm (72 x 72 DPI)

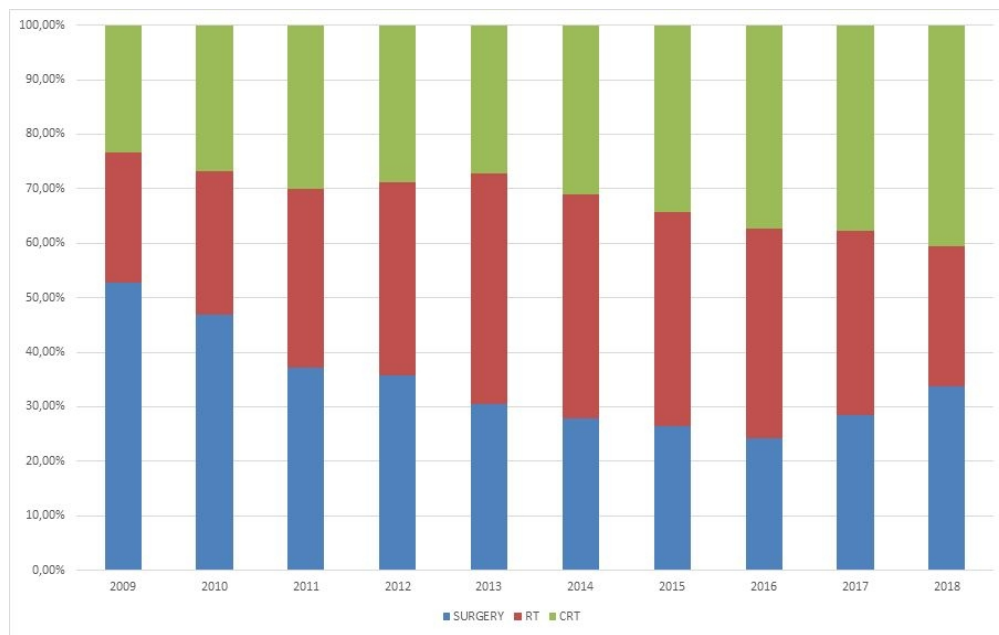

Figure 2. The proportional utilization of surgery, radiotherapy (RT) and chemoradiotherapy (CRT) in treatment of laryngeal cancer in Poland in 2009-2018.

319x201mm (72 x 72 DPI)

Table 2A. The number of surgical procedures according to ICD 9 codes applied to patients with laryngeal cancer during the 10 year period.

| ICD9/Year                                                                                         | 2009        | 2010        | 2011       | 2012        | 2013       | 2014       | 2015       | 2016       | 2017       | 2018       | Total       |
|---------------------------------------------------------------------------------------------------|-------------|-------------|------------|-------------|------------|------------|------------|------------|------------|------------|-------------|
| <b>Procedures involving total laryngectomies</b>                                                  |             |             |            |             |            |            |            |            |            |            |             |
| 30.3 Complete laryngectomy                                                                        | 4           | 9           | 5          | 6           | 7          | 13         | 24         | 5          | -          | -          | <b>73</b>   |
| 30.31 En bloc laryngeal resection with thyroidectomy and tracheostomy                             | 85          | 70          | 39         | 79          | 48         | 33         | 27         | 20         | 15         | 14         | <b>430</b>  |
| 30.32 Laryngopharyngectomy                                                                        | 521         | 472         | 470        | 517         | 539        | 527        | 559        | 547        | 551        | 531        | <b>5234</b> |
| 30.39 Other complete laryngectomy                                                                 | 347         | 351         | 245        | 303         | 241        | 221        | 202        | 203        | 188        | 153        | <b>2454</b> |
| 30.4 Radical laryngectomy (with radical neck dissection)                                          | 23          | 17          | 8          | 3           | 4          | 6          | 7          | 1          | -          | -          | <b>69</b>   |
| 30.41 Radical laryngectomy (with radical neck dissection) and with thyroidectomy and tracheostomy | 44          | 45          | 31         | 35          | 38         | 45         | 48         | 42         | 39         | 40         | <b>407</b>  |
| 30.49 Other radical laryngectomy                                                                  | 98          | 96          | 115        | 109         | 108        | 113        | 81         | 67         | 70         | 38         | <b>895</b>  |
| <b>Summary</b>                                                                                    | <b>1122</b> | <b>1060</b> | <b>913</b> | <b>1052</b> | <b>985</b> | <b>958</b> | <b>948</b> | <b>885</b> | <b>863</b> | <b>776</b> | <b>9562</b> |
| <b>Procedures involving partial resection of larynx</b>                                           |             |             |            |             |            |            |            |            |            |            |             |
| 30.1 Hemilaryngectomy                                                                             | 42          | 38          | 38         | 25          | 24         | 16         | 16         | 13         | 12         | 13         | <b>237</b>  |
| 30.2 Other partial laryngectomy                                                                   | -           | 3           | 2          | -           | -          | 1          | -          | -          | -          | -          | <b>6</b>    |

|                                                                               |            |            |            |            |            |            |            |            |            |            |             |
|-------------------------------------------------------------------------------|------------|------------|------------|------------|------------|------------|------------|------------|------------|------------|-------------|
| 30.21 Epiglottidectomy                                                        | 15         | 11         | 7          | 10         | 10         | 6          | 10         | 5          | 1          | 6          | <b>81</b>   |
| 30.22 Vocal cordectomy                                                        | 250        | 276        | 262        | 307        | 249        | 309        | 358        | 369        | 409        | 393        | <b>3182</b> |
| 30.23 Partial laryngectomy with reconstruction                                | 133        | 115        | 94         | 108        | 134        | 93         | 80         | 65         | 57         | 56         | <b>935</b>  |
| 30.24 Laryngeal cartilage resection                                           | 1          | 1          | 1          | 1          | 1          |            | 3          |            | 2          | 2          | <b>12</b>   |
| 30.29 Other partial laryngectomy                                              | 120        | 110        | 120        | 128        | 126        | 152        | 140        | 122        | 101        | 109        | <b>1228</b> |
| <b>Summary</b>                                                                | <b>561</b> | <b>554</b> | <b>524</b> | <b>579</b> | <b>544</b> | <b>577</b> | <b>607</b> | <b>574</b> | <b>582</b> | <b>579</b> | <b>5681</b> |
| <b>Procedures involving local destruction or excision of laryngeal tissue</b> |            |            |            |            |            |            |            |            |            |            |             |
| 30.0 Excision or destruction of lesion or tissue of larynx                    | 26         | 6          | 3          | 4          | 1          | 5          | 5          | -          | -          | -          | <b>50</b>   |
| 30.09 Other excision or destruction of lesion or tissue of larynx             | 161        | 167        | 165        | 176        | 151        | 165        | 210        | 167        | 123        | 186        | <b>1671</b> |
| 31.5 Local excision or destruction of larynx lesion or tissue of trachea      | 46         | 80         | 61         | 67         | 87         | 135        | 123        | 135        | 104        | 137        | <b>975</b>  |
| <b>Summary</b>                                                                | <b>233</b> | <b>253</b> | <b>229</b> | <b>247</b> | <b>239</b> | <b>305</b> | <b>338</b> | <b>302</b> | <b>227</b> | <b>323</b> | <b>2696</b> |

STROBE Statement—Checklist of items that should be included in reports of *cohort studies*

|                              | Item No | Recommendation                                                                                                                                                                                                                                                                                                                                                                                                                                                                            |
|------------------------------|---------|-------------------------------------------------------------------------------------------------------------------------------------------------------------------------------------------------------------------------------------------------------------------------------------------------------------------------------------------------------------------------------------------------------------------------------------------------------------------------------------------|
| <b>Title and abstract</b>    | 1       | (a) Indicate the study's design with a commonly used term in the title or the abstract<br>Title page 1<br>(b) Provide in the abstract an informative and balanced summary of what was done and what was found<br>Abstract page 2, results section                                                                                                                                                                                                                                         |
| <b>Introduction</b>          |         |                                                                                                                                                                                                                                                                                                                                                                                                                                                                                           |
| Background/rationale         | 2       | Explain the scientific background and rationale for the investigation being reported<br>Throughout the introduction, page 3                                                                                                                                                                                                                                                                                                                                                               |
| Objectives                   | 3       | State specific objectives, including any prespecified hypotheses<br>The last paragraph of the introduction, page 3                                                                                                                                                                                                                                                                                                                                                                        |
| <b>Methods</b>               |         |                                                                                                                                                                                                                                                                                                                                                                                                                                                                                           |
| Study design                 | 4       | Present key elements of study design early in the paper<br>The last paragraph of the methods section, page 5                                                                                                                                                                                                                                                                                                                                                                              |
| Setting                      | 5       | Describe the setting, locations, and relevant dates, including periods of recruitment, exposure, follow-up, and data collection<br>Second paragraph of the methods section, page 4                                                                                                                                                                                                                                                                                                        |
| Participants                 | 6       | (a) Give the eligibility criteria, and the sources and methods of selection of participants. Describe methods of follow-up<br>Third paragraph of the methods section, page 4<br>(b) For matched studies, give matching criteria and number of exposed and unexposed - not applicable                                                                                                                                                                                                      |
| Variables                    | 7       | Clearly define all outcomes, exposures, predictors, potential confounders, and effect modifiers. Give diagnostic criteria, if applicable<br>Third paragraph of the methods section, page 4                                                                                                                                                                                                                                                                                                |
| Data sources/<br>measurement | 8*      | For each variable of interest, give sources of data and details of methods of assessment (measurement). Describe comparability of assessment methods if there is more than one group - not applicable                                                                                                                                                                                                                                                                                     |
| Bias                         | 9       | Describe any efforts to address potential sources of bias - not applicable                                                                                                                                                                                                                                                                                                                                                                                                                |
| Study size                   | 10      | Explain how the study size was arrived at<br>Second paragraph of the methods section, page 4                                                                                                                                                                                                                                                                                                                                                                                              |
| Quantitative variables       | 11      | Explain how quantitative variables were handled in the analyses. If applicable, describe which groupings were chosen and why<br>Described in statistical analysis subsection, page 5                                                                                                                                                                                                                                                                                                      |
| Statistical methods          | 12      | (a) Describe all statistical methods, including those used to control for confounding<br>Described in statistical analysis subsection, page 5<br>(b) Describe any methods used to examine subgroups and interactions<br>Described in statistical analysis subsection, page 5<br>(c) Explain how missing data were addressed - not applicable<br>(d) If applicable, explain how loss to follow-up was addressed - not applicable<br>(e) Describe any sensitivity analyses - not applicable |
| <b>Results</b>               |         |                                                                                                                                                                                                                                                                                                                                                                                                                                                                                           |
| Participants                 | 13*     | (a) Report numbers of individuals at each stage of study—eg numbers potentially eligible, examined for eligibility, confirmed eligible, included in the study, completing follow-up, and analysed<br>The result section, page 5, table 1.                                                                                                                                                                                                                                                 |



|                          |     |                                                                                                                                                                                                                                                      |
|--------------------------|-----|------------------------------------------------------------------------------------------------------------------------------------------------------------------------------------------------------------------------------------------------------|
|                          |     | (b) Give reasons for non-participation at each stage - not applicable                                                                                                                                                                                |
|                          |     | (c) Consider use of a flow diagram - not applicable                                                                                                                                                                                                  |
| Descriptive data         | 14* | (a) Give characteristics of study participants (eg demographic, clinical, social) and information on exposures and potential confounders<br>Throughout the result section, page 5 -8, table 1, table 2, table 3.                                     |
|                          |     | (b) Indicate number of participants with missing data for each variable of interest - not applicable                                                                                                                                                 |
|                          |     | (c) Summarise follow-up time (eg, average and total amount) - not applicable                                                                                                                                                                         |
| Outcome data             | 15* | Report numbers of outcome events or summary measures over time - not applicable                                                                                                                                                                      |
| Main results             | 16  | (a) Give unadjusted estimates and, if applicable, confounder-adjusted estimates and their precision (eg, 95% confidence interval). Make clear which confounders were adjusted for and why they were included<br>The results section, page 5, table 1 |
|                          |     | (b) Report category boundaries when continuous variables were categorized - not applicable                                                                                                                                                           |
|                          |     | (c) If relevant, consider translating estimates of relative risk into absolute risk for a meaningful time period - not applicable                                                                                                                    |
| Other analyses           | 17  | Report other analyses done—eg analyses of subgroups and interactions, and sensitivity analyses - not applicable                                                                                                                                      |
| <b>Discussion</b>        |     |                                                                                                                                                                                                                                                      |
| Key results              | 18  | Summarise key results with reference to study objectives - page 9                                                                                                                                                                                    |
| Limitations              | 19  | Discuss limitations of the study, taking into account sources of potential bias or imprecision. Discuss both direction and magnitude of any potential bias<br>The last paragraph of the discussion, page 11                                          |
| Interpretation           | 20  | Give a cautious overall interpretation of results considering objectives, limitations, multiplicity of analyses, results from similar studies, and other relevant evidence<br>Throughout the discussion page 9-11                                    |
| Generalisability         | 21  | Discuss the generalisability (external validity) of the study results - not applicable                                                                                                                                                               |
| <b>Other information</b> |     |                                                                                                                                                                                                                                                      |
| Funding                  | 22  | Give the source of funding and the role of the funders for the present study and, if applicable, for the original study on which the present article is based<br>Declarations, page 11-12.                                                           |

\*Give information separately for exposed and unexposed groups.

**Note:** An Explanation and Elaboration article discusses each checklist item and gives methodological background and published examples of transparent reporting. The STROBE checklist is best used in conjunction with this article (freely available on the Web sites of PLoS Medicine at <http://www.plosmedicine.org/>, Annals of Internal Medicine at <http://www.annals.org/>, and Epidemiology at <http://www.epidem.com/>). Information on the STROBE Initiative is available at <http://www.strobe-statement.org>.

# BMJ Open

## A review of recent treatment trends of laryngeal cancer in Poland: population-based study.

|                                 |                                                                                                                                                                                                                                                                                                                                                                                                                                              |
|---------------------------------|----------------------------------------------------------------------------------------------------------------------------------------------------------------------------------------------------------------------------------------------------------------------------------------------------------------------------------------------------------------------------------------------------------------------------------------------|
| Journal:                        | <i>BMJ Open</i>                                                                                                                                                                                                                                                                                                                                                                                                                              |
| Manuscript ID                   | bmjopen-2020-045308.R2                                                                                                                                                                                                                                                                                                                                                                                                                       |
| Article Type:                   | Original research                                                                                                                                                                                                                                                                                                                                                                                                                            |
| Date Submitted by the Author:   | 09-Mar-2021                                                                                                                                                                                                                                                                                                                                                                                                                                  |
| Complete List of Authors:       | Rzepakowska, Anna; Medical University of Warsaw, Department of Otorhinolaryngology, Head and Neck Surgery<br>Żurek, Michał; Medical University of Warsaw, Students Scientific Research Group at the Department of Otorhinolaryngology Head and Neck Surgery; Polish Ministry of Health, Department of Analyses and Strategies<br>Niemczyk, Kazimierz; Medical University of Warsaw, Department of Otorhinolaryngology, Head and Neck Surgery |
| <b>Primary Subject Heading</b>: | Ear, nose and throat/otolaryngology                                                                                                                                                                                                                                                                                                                                                                                                          |
| Secondary Subject Heading:      | Oncology                                                                                                                                                                                                                                                                                                                                                                                                                                     |
| Keywords:                       | Head & neck surgery < OTOLARYNGOLOGY, Laryngology < OTOLARYNGOLOGY, Adult radiotherapy < RADIOTHERAPY, Head & neck tumours < ONCOLOGY                                                                                                                                                                                                                                                                                                        |
|                                 |                                                                                                                                                                                                                                                                                                                                                                                                                                              |

SCHOLARONE™  
Manuscripts



I, the Submitting Author has the right to grant and does grant on behalf of all authors of the Work (as defined in the below author licence), an exclusive licence and/or a non-exclusive licence for contributions from authors who are: i) UK Crown employees; ii) where BMJ has agreed a CC-BY licence shall apply, and/or iii) in accordance with the terms applicable for US Federal Government officers or employees acting as part of their official duties; on a worldwide, perpetual, irrevocable, royalty-free basis to BMJ Publishing Group Ltd ("BMJ") its licensees and where the relevant Journal is co-owned by BMJ to the co-owners of the Journal, to publish the Work in this journal and any other BMJ products and to exploit all rights, as set out in our [licence](#).

The Submitting Author accepts and understands that any supply made under these terms is made by BMJ to the Submitting Author unless you are acting as an employee on behalf of your employer or a postgraduate student of an affiliated institution which is paying any applicable article publishing charge ("APC") for Open Access articles. Where the Submitting Author wishes to make the Work available on an Open Access basis (and intends to pay the relevant APC), the terms of reuse of such Open Access shall be governed by a Creative Commons licence – details of these licences and which [Creative Commons](#) licence will apply to this Work are set out in our licence referred to above.

Other than as permitted in any relevant BMJ Author's Self Archiving Policies, I confirm this Work has not been accepted for publication elsewhere, is not being considered for publication elsewhere and does not duplicate material already published. I confirm all authors consent to publication of this Work and authorise the granting of this licence.

1  
2  
3 Title: A review of recent treatment trends of laryngeal cancer in Poland: population-based study.  
4

5 Authors:

6  
7 Anna Rzepakowska MD, PhD<sup>1</sup> ORCID: 0000-0003-4012-8271  
8

9 Michał Żurek<sup>2,3</sup> ORCID: 0000-0001-5031-8007  
10

11 Kazimierz Niemczyk MD, Professor<sup>1</sup> ORCID: 0000-0003-3013-6403  
12

13 Affiliations:

14  
15 <sup>1</sup>Department of Otorhinolaryngology Head and Neck Surgery, Medical University of Warsaw  
16

17 <sup>2</sup> Doctoral School, Medical University of Poland, 02-091 Warsaw, Poland  
18

19 <sup>3</sup>Department of Analyses and Strategies, Polish Ministry of Health, Warsaw 00-952, Poland;  
20 m.zurek@mz.gov.pl  
21

22 Corresponding author:

23 Anna Rzepakowska  
24

25 Department of Otorhinolaryngology Head and Neck Surgery, Medical University of Warsaw  
26

27 ul. Banacha 1a  
28

29 02-097 Warsaw  
30

31 Phone: +48 225992716  
32

33 Fax: +48 225992523  
34

35 arzepakowska@wum.edu.pl  
36

37 ORCID ID: 0000-0003-4012-8271  
38  
39  
40  
41  
42  
43  
44  
45  
46  
47  
48  
49  
50  
51  
52  
53  
54  
55  
56  
57  
58  
59  
60

1  
2  
3  
4  
5 Objectives: To investigate the utilization of different treatment modalities for patients with laryngeal  
6 cancer (LC) during last decade in Poland.  
7

8  
9 Setting: Retrospective population-based study  
10

11 Participants: Patients with LC treated between January 2009 and December 2018.  
12

13  
14 Primary and secondary outcome measures: The contemporary utilisation of treatment modalities of  
15 LC: surgery with intent of radical resection (total or partial laryngectomy), radiotherapy (RT) and  
16 chemoradiotherapy (CRT).  
17  
18

19  
20 Results: There was determined the overall number of 22 957 new diagnosis of LC from 2010 to 2018  
21 and confirmed the steady decrease in the incidence rate of LC in following years from 7.7 to 6.03. The  
22 mean age of patients with LC was raising by an average of 0.3832 of year per year. There was  
23 observed decrease in number of total laryngectomies in subsequent years (from 1122 in 2009 to 776 in  
24 2018). The number of procedures involving partial laryngeal resection was within stable ranges  
25 however the upward trend was observed separately for vocal cordectomy. There was established  
26 decreased involvement of surgery in LC treatment from 52.8% in 2009 to 24.3% in 2016 with the  
27 subsequent rise to 33.7% in 2018. The percentage of patients receiving RT increased from 23.8% in  
28 2009 to 42.1% in 2013 with the next decrease to 25.7% in 2018. The utilization of CRT in LC  
29 treatment was progressively increasing over analyzed years from 23.4% in 2009 reaching 40.6% in  
30 2018.  
31  
32

33  
34 Conclusions: The presented data revealed an increase in total number of organs preserving treatment  
35 modality with CRT in subsequent years with decreasing number of total laryngectomies in Polish  
36 patients with LC.  
37  
38

39  
40 Key words: laryngeal cancer, surgery, radiation, chemoradiotherapy  
41  
42

43  
44 Strengths and limitations of the study  
45  
46

- 47  
48
- 49 • This study is based on the national cohort of patients with laryngeal cancer.
  - 50 • It investigates the trends in treatment modalities during the last decade in the presence of the
  - 51 overall decline in outcomes.
  - 52 • Comparison of organs preserving treatment modality with chemoradiotherapy and surgical
  - 53 procedure of total laryngectomy was analyzed in subsequent years.
  - 54 • The percentage of transoral laryngeal procedures and open partial laryngectomies was
  - 55 analyzed.
  - 56
  - 57
  - 58
  - 59
  - 60

- Information concerning stage, locoregional control, metastatic disease, prior or concurrent cancer diagnosis, received radiation doses, data regarding CT administration with a number of cycles, specific agents, doses and long-term toxicities were not analyzed

## Introduction

Approximately 177,422 new cases of laryngeal cancer (LC) were diagnosed worldwide in 2018 according to the estimation of the International Agency for Research on Cancer and the forecasts indicate an increasing trend in the future [1]. In 2017, population-based studies prepared by the Polish National Cancer Registry confirmed 2,224 new cases of LC and 1,580 deaths due to this type of cancer [2]. For comparison, the incidence and mortality due to LC reported in 2009 was 2,413 and 1,585 respectively [3]. Although statistics show decreasing rates for new diagnoses in our country, survival rates are not improving. Recommendations for primary treatment of LC differ depending on the stage of the disease and the site of cancer within the organ but also follow certain trends that promote organ preservation methods and depend on the availability of equipment. Historically, total laryngectomy with postoperative radiation was standard treatment for advanced stage (T3, T4) LC. However, the results of the Department of Veterans Affairs (VA) Laryngeal Cancer Study from 1991 and the Radiation Therapy Oncology Group (RTOG) 91-11 Study from 2003 modified the treatment paradigm focusing on conservative laryngeal therapy with chemoradiation (CRT), primarily in the United States and subsequently in Europe [4,5]. This approach has influenced the management of advanced LC and the number of primary laryngectomies, thus rendering the procedure rescue treatment. For T3 and T4 LC, current treatment protocols recommend concomitant or sequential radiotherapy (RT) with chemotherapy (CT) or total laryngectomy (TL). However, the radiological evidence of cartilage tumor infiltration is rather an indication for surgical resection [6]. In contrast, the early stages of LC (T1 and T2) should always be treated with an initial intent of organ preservation. The recommendations include surgical resection or primary RT and both methods give comparable oncological outcomes. Both these treatment modalities have evolved significantly over the last two decades. The prevalence and advances in transoral endoscopic surgical methods have replaced the open laryngeal surgery in primary treatment of T1 and T2 LC. The improvements in radiation techniques have also reduced the contribution of upfront RT treatment and provided high-quality design and delivery with target volume determination and the use of Intensity Modulated Radiation Therapy – IMRT [7]. This increases the therapeutic dose within the tumor while optimally sparing normal tissue adjacent to the tumor, e.g. the carotid arteries.

The purpose of this study was to investigate the trends in treatment modalities during the last decade in patients with LC in Poland, based on the national cohort of patients from the National Health Fund Database in order to evaluate the findings, compare them with global trends and assess the possibilities for improving survival rates.

## Materials and Methods

### Patients and Public Involvement statement

All data used in the study proposals were de-identified and therefore the approval of the Institutional Review Board was waived. Patients were not involved in the study.

The study design was a retrospective population-based study. The data concerned patients with LC and their treatment procedures between January 2009 and December 2018 and was obtained from the National Database of Hospitalized Patients maintained by the National Health Fund (NFZ) of Poland [8]. The database compiles all data related to hospitalizations in public and private hospitals financed from public sources. The available database contains medical data (including diagnoses and procedures), identification numbers, dates of birth, area codes, and patient genders. Diagnoses are coded according to the International Classification of Diseases, 10th Revision (ICD-10), while surgical procedures are coded using the International Classification of Diseases, 9th Revision (ICD-9).

Patients with laryngeal carcinoma were identified according to the ICD-10 classification with the following codes: C32 - Malignant neoplasm of larynx, C32.0 – Malignant neoplasm of glottis, C32.1 - Malignant neoplasm of supraglottis, C32.2 - Malignant neoplasm of subglottis, C32.3 - Malignant neoplasm of laryngeal cartilage, C32.8 - Malignant neoplasm of overlapping sites of larynx, C32.9 - Malignant neoplasm of larynx, unspecified, C10.1 - Malignant neoplasm of anterior surface of epiglottis, and C13.1 - Malignant neoplasm of aryepiglottic fold, hypopharyngeal aspect. Procedures of interest included surgical resection of different extent according to the ICD-9 classification. All of the following procedures were included in the analysis: 30.1 Hemilaryngectomy, 30.2 Other partial laryngectomy, 30.21 Epiglottidectomy, 30.22 Vocal cordectomy, 30.23 Partial laryngectomy with reconstruction, 30.24 Laryngeal cartilage resection, 30.29 Other partial laryngectomy, 30.3 Complete laryngectomy, 30.31 En bloc laryngeal resection with thyroidectomy and tracheostomy, 30.32 Laryngopharyngectomy, 30.39 Other complete laryngectomy, 30.4 Radical laryngectomy (with radical neck dissection), 30.41 Radical laryngectomy (with radical neck dissection) and with thyroidectomy and tracheostomy, 30.49 Other radical laryngectomy, 30.0 Excision or destruction of lesion or tissue of larynx, 30.09 Other excision or destruction of lesion or tissue of larynx, 31.5 Local excision or destruction of larynx lesion or tissue of trachea. The RT and CT treatment was identified according to the ICD-10 classification (Z51.0 - antineoplastic radiation therapy and Z51.1 - antineoplastic chemotherapy).

Data on the population of Polish citizens were obtained from Statistics Poland (Główny Urząd Statystyczny) [9].

Taking into account different treatment modalities for LC, the following three options were analysed: surgery with intent of radical resection of LC (total or partial laryngectomy) including patients who

received induction CRT or adjuvant RT/CRT; radiotherapy - including patients treated with RT alone or following induction CT; and chemoradiotherapy - including patients treated with CRT alone or following induction CT.

### Statistical analysis

Python 3.3.6 and Microsoft Excel 2016 were used to separate and analyze patient data from datasets. For quantitative variables, basic statistics (mean and standard deviation) were calculated. A linear regression model was used to analyze age variability of patients. The incidence rate is the number of new cases divided by 100,000 citizens.

### Results

Considering the selected ICD-10 codes, the overall number of 61,571 hospitalizations related to LC from 2009 to 2018 in Poland was identified. The number of hospitalizations per year ranged from 5,763 to 6,674 without any specified trend. The highest numbers of hospital stays were recorded for C32.0 - Malignant neoplasm of glottis (24,208) as well as C32.8 - Malignant neoplasm of overlapping sites of larynx and C32.9 - Malignant neoplasm of larynx, unspecified (13,068 and 17,268 respectively). Taking into account only primary hospitalization and the determination of the LC diagnosis, the overall number of 22,957 new diagnoses of LC from 2010 to 2018 was determined. This number could not be established for 2009 year due to incomplete data in the register for previous years and the possibility of revaluation. A steady decrease in the incidence rate of LC was observed in the following years from 7.7 to 6.03 (mean incidence rate 6.63; 95% CI: 6.23-7.03). The trend was especially significant for male patients (the decrease in new diagnoses from 2,577 in 2010 to 1,987 in 2018) but was not as evident for female patients (from 388 in 2010 to 330 in 2018). In contrast to the incidence rate, the mean age of patients with diagnosed LC significantly increased, growing on average by 0.3832 (95% CI: 0.3381-0.4283) years per year. The trend was described by means of linear regression using the following formula:  $Y = 0.3832 * X + 61.345$ , where X is the serial number of the year (i.e. 2009 - 1, 2010 - 2 etc.). The regression model was very well fitted to the data and explained 99% ( $R^2 = 0.9909$ ) of age variability of patients. Demographic data on population revealed that about 70% of the LC patients were urban dwellers. The percentage of urban dwellers has slightly decreased over the last 10 years. Table 1.

Table 1. The demographical characteristic of patients with new diagnosis of laryngeal cancer in Polish population from 2010 to 2018.

| <b>C32 patient s</b> | <b>2010</b> | <b>2011</b> | <b>2012</b> | <b>2013</b> | <b>2014</b> | <b>2015</b> | <b>2016</b> | <b>2017</b> | <b>2018</b> | <b>All</b> |
|----------------------|-------------|-------------|-------------|-------------|-------------|-------------|-------------|-------------|-------------|------------|
|                      |             |             |             |             |             |             |             |             |             |            |



|                                     |                  |                  |                  |                  |                  |                 |                  |                  |                  |                  |
|-------------------------------------|------------------|------------------|------------------|------------------|------------------|-----------------|------------------|------------------|------------------|------------------|
| <b>No of patients</b>               | 2965             | 2682             | 2653             | 2571             | 2520             | 2539            | 2360             | 2350             | 2317             | 22957            |
| <b>Population (in thousands)</b>    | 38517            | 38526            | 38534            | 38502            | 38484            | 38455           | 38427            | 38422            | 38413            | -                |
| <b>Incidence rate*</b>              | 7.70             | 6.96             | 6.88             | 6.68             | 6.55             | 6.60            | 6.14             | 6.12             | 6.03             | -                |
| <b>Age mean <math>\pm</math> SE</b> | 62.33 $\pm$ 9.43 | 62.72 $\pm$ 9.27 | 62.72 $\pm$ 9.19 | 63.42 $\pm$ 9.13 | 63.56 $\pm$ 8.87 | 64.1 $\pm$ 8.72 | 64.05 $\pm$ 8.99 | 64.49 $\pm$ 8.99 | 64.82 $\pm$ 8.97 | 63.58 $\pm$ 9.06 |
| <b>Women (%)</b>                    | 388 (13.09 %)    | 336 (12.53 %)    | 351 (13.23 %)    | 364 (14.16 %)    | 351 (13.93 %)    | 353 (13.9 %)    | 330 (13.98 %)    | 308 (13.11 %)    | 330 (14.24 %)    | 3111 (13.57 %)   |
| <b>Men (%)</b>                      | 2577 (86.91 %)   | 2346 (87.47 %)   | 2302 (86.77 %)   | 2207 (85.84 %)   | 2169 (86.07 %)   | 2186 (86.10 %)  | 2030 (86.02 %)   | 2042 (86.89 %)   | 1987 (85.76 %)   | 19846 (86.43 %)  |
| <b>Urban residence (%)</b>          | 2184 (73.66 %)   | 1940 (72.33 %)   | 1913 (72.11 %)   | 1868 (72.66 %)   | 1802 (71.51 %)   | 1822 (71.76 %)  | 1672 (70.85 %)   | 1666 (70.89 %)   | 1617 (69.79 %)   | 16484 (71.73 %)  |
| <b>Rural Residence (%)</b>          | 781 (26.34 %)    | 742 (27.67 %)    | 740 (27.89 %)    | 703 (27.34 %)    | 718 (28.49 %)    | 717 (28.24 %)   | 688 (29.15 %)    | 684 (29.11 %)    | 700 (30.21 %)    | 6473 (28.27 %)   |

\*Incidence rate = no of all C32 new diagnoses / 100 000 citizens

Analyzing the number of individual ICD-10 codes related to newly diagnosed LC, the highest number of patients with C32.0 - Malignant neoplasm of glottis (12,566) was identified. A relatively high number of C32.9 - Malignant neoplasm of larynx, unspecified and C32 - Malignant neoplasm of larynx were found (5,686 and 1,118 respectively), however neither of them specifies laryngeal location or cancer stage. The new diagnosis of advanced cancer stages with cartilage infiltration C32.3 and extralaryngeal invasion C32.8 were recognized in 286 and 5,279 patients respectively. The calculated total hospitalization coefficient (number of hospitalizations / number of new diagnoses) for LC patients was 2.04 during the analyzed period. Patients with C32.9 were hospitalized most frequently, on average 2.74 hospitalizations.

The surgical procedures applied to laryngeal cancer treatment were categorized according to the extent of the resection. Procedures involving total laryngectomy (30.3, 30.31, 30.32, 30.39, 30.4, 30.41, 30.49) were performed in 9,562 patients during the 10-year period. The most common procedure was 30.32 Laryngopharyngectomy– 5,234 (54.7%) and the second in order 30.39 Other complete laryngectomy – 2,454 (25.7%). The partial resection of the larynx (30.1, 30.2, 30.21, 30.22, 30.23, 30.24, 30.29) was applied 5,681 times as surgical treatment method over this time with significant advantage of the 30.22 Vocal cordectomy procedure performed 3,182 times (56%). The overall number of procedures restricted to local excision or destruction of the laryngeal lesion (30.0, 30.09, 31.5) was 2,696. Table 2. The number of total laryngectomies decreased in subsequent analyzed years (from 1,122 in 2009 to 776 in 2018). Contrary to total laryngectomy, the number of procedures involving partial laryngeal resection was quite stable in total count with 561 procedures in 2009 and 579 in 2018. However, the upward trend was observed separately for 30.22 Vocal cordectomy procedure (from 250 in 2009 to 393 in 2018) at the cost of a downward trend for other procedures of partial laryngeal resection. Figure 1.

Table 2. The number of surgical procedures applied to patients with laryngeal cancer with relation to extension of resection during the 10 year period.

| Year/No (n)                                                                     | 2009 | 2010 | 2011 | 2012 | 2013 | 2014 | 2015 | 2016 | 2017 | 2018 | Total |
|---------------------------------------------------------------------------------|------|------|------|------|------|------|------|------|------|------|-------|
| Surgical procedures involving total laryngectomy                                |      |      |      |      |      |      |      |      |      |      |       |
| (n)                                                                             | 1122 | 1060 | 913  | 1052 | 985  | 958  | 948  | 885  | 863  | 776  | 9562  |
| Surgical procedures involving partial resection of larynx                       |      |      |      |      |      |      |      |      |      |      |       |
| (n)                                                                             | 561  | 554  | 524  | 579  | 544  | 577  | 607  | 574  | 582  | 579  | 5681  |
| Surgical procedures involving local destruction or excision of laryngeal tissue |      |      |      |      |      |      |      |      |      |      |       |
| (n)                                                                             | 233  | 253  | 229  | 247  | 239  | 305  | 338  | 302  | 227  | 323  | 2696  |

Supplementary file 1-Table A. The number of surgical procedures according to ICD 9 codes applied to patients with laryngeal cancer during the 10-year period.

Considering the surgical procedures with the intent of radical resection of LC (total or partial laryngectomy), they were applied 15,243 times as a treatment modality over the analyzed period. Among those cases the additional treatment of RT or CRT was performed in 4,250 patients. RT alone or with induction CT was applied over the same period for 16,308 patients, while concurrent or subsequent CRT was administered for treatment in 15,032 patients. There was observed a downward

trend for surgical methods of LC treatment from 52.8% in 2009 to 24.3% in 2016 with the subsequent rise to 33.7% in 2018. The percentage of patients receiving RT was increasing from 23.8% in 2009 to 42.1% in 2013 and next it decreased to the level of 25.7% in 2018. The utilization of CRT in LC treatment was progressively increasing over analyzed years from 23.4% in 2009 reaching 40.6% in 2018. Table 3. Figure 2.

Table 3. The numbers of different treatment modalities for laryngeal cancer including surgery, radiotherapy (RT) and chemoradiotherapy (CRT) in 2009-2018 with the percentage share in following years.

| TRETEMENT \ YEAR      | 2009  | 2010  | 2011  | 2012  | 2013  | 2014  | 2015  | 2016  | 2017  | 2018  | Total |
|-----------------------|-------|-------|-------|-------|-------|-------|-------|-------|-------|-------|-------|
| <b>SURGERY</b>        | 1344  | 1278  | 1023  | 1109  | 998   | 1044  | 1073  | 1040  | 1005  | 1042  | 10956 |
| <b>SURGERY_RT/CRT</b> | 339   | 336   | 414   | 522   | 531   | 491   | 482   | 419   | 440   | 313   | 4287  |
| <b>RT</b>             | 720   | 850   | 1181  | 1508  | 1929  | 2070  | 2095  | 2043  | 1568  | 960   | 14924 |
| <b>CT_RT</b>          | 39    | 60    | 92    | 110   | 180   | 191   | 223   | 261   | 152   | 76    | 1384  |
| <b>CT_CRT</b>         | 76    | 118   | 174   | 219   | 240   | 301   | 392   | 477   | 352   | 304   | 2653  |
| <b>CRT</b>            | 671   | 806   | 990   | 1102  | 1125  | 1401  | 1622  | 1766  | 1568  | 1328  | 12379 |
| <b>SURGERY</b>        | 1683  | 1614  | 1437  | 1631  | 1529  | 1535  | 1555  | 1459  | 1445  | 1355  | 15243 |
| <b>RT</b>             | 759   | 910   | 1273  | 1618  | 2109  | 2261  | 2318  | 2304  | 1720  | 1036  | 16308 |
| <b>CRT</b>            | 747   | 924   | 1164  | 1321  | 1365  | 1702  | 2014  | 2243  | 1920  | 1632  | 15032 |
| <b>SURGERY (%)</b>    | 52.78 | 46.81 | 37.09 | 35.69 | 30.56 | 27.92 | 26.41 | 24.29 | 28.42 | 33.68 | 32.72 |
| <b>RT (%)</b>         | 23.80 | 26.39 | 32.86 | 35.40 | 42.15 | 41.12 | 39.37 | 38.36 | 33.82 | 25.75 | 35.01 |
| <b>CRT (%)</b>        | 23.42 | 26.80 | 30.05 | 28.91 | 27.28 | 30.96 | 34.21 | 37.35 | 37.76 | 40.57 | 32.27 |

SURGERY = SURGERY + SURGERY\_RT/CRT; RT = RT + CT\_RT; CRT = CT\_CRT + CRT

## Discussion

The population-based analyses in the majority of developed countries show a decreasing incidence of LC, but paradoxically declining outcomes can be observed over the recent decade. This contradicts trends in survival for other cancer types. It was speculated that the overall decline in outcomes may reflect the consistent rise in larynx-preserving treatment methods with CRT, especially for T4 tumours or partial laryngectomies for T3 [10,11]. The extensive surgical treatment provided satisfactory survival results, however, it induced the deprivation of laryngeal phonation and permanent cervical stoma. The trend of organ-preserving treatment made the selection of treatment for the same tumor far more complex and the fact that it involved opposite strategies, has risen many controversies. The new directions are inevitable, however, their efficiency should be monitored.

The national cohort studies analyzing the contemporary utilisation of treatment modalities of LC confronted to population-based studies are not so commonly performed. However, those expertise can update current trends in practice patterns and assess how the practice affects survival outcomes.

The presented study used the national cohort of patients who were diagnosed and treated between 2009 and 2018 in Poland to measure utilisation trends of LC treatment over that period. Initially, our data confirmed the decrease in the number of patients with LC observed worldwide. In the following years, a steady decrease was observed in the incidence rate from 7.77 / 100,000 in 2009 and 6.03 / 100,000 in 2018. The reports from Germany, the Netherlands, the USA and the Scandinavian countries present such downward trends, however the incidence rates in those countries are lower than in Poland [12-14]. Another aspect to consider after our analysis is the gradual increase in the average age of patients with laryngeal cancer. We observed that the average age of the patients was almost 4 years higher in 2018 compared to 2009. This trend may result from changes in the structure of Polish society but also more effective methods of diagnosis and treatment in the last years. Similar results were presented in the study of Reizenstein et al. [15] or Peller et al. [16], although the increase of average age in German or Swedish patients was not as significant as in Polish ones. Considering the inhabitancy of LC patients almost 72% of them lived in cities, however the percentage decreased over 10 years. The results of the study by Włodarczyk et al. confirm the higher percentage of regular smokers in urban areas (30,3%) than in the countryside (25.4%) [17].

Regarding the surgical treatment methods, a downward trend in total laryngectomies in the subsequent analysed years (from 1,122 in 2009 down to 776 in 2018) could be observed and the declining trend was not only dependent on the decreasing incidence. Contrary to a total laryngectomy, the number of procedures involving partial laryngeal resection remained stable. However an upward trend was observed for vocal cordectomy, performed as transoral laryngeal microsurgery. Hence the open partial laryngectomies rate has decreased. Summarising the overall number of surgical approaches in LC treatment, we observed a temporary downward trend from 52.8% in 2009 to 24.3% in 2016 and

1  
2  
3 subsequent rise to 33.7% in 2018. Contrary to surgery the percentage of patients receiving RT  
4 increased from 23.8% in 2009 to 42.1% in 2013 and then there was a decrease to the level of 25.7% in  
5 2018. The utilisation of CRT in LC treatment was increasing progressively over the analysed period  
6 from 23.4% in 2009 to 40.6% in 2018. A quite comparable utility of treatment modalities in LC,  
7 additionally covering the earlier period is presented by Patel et al. in their analysis of the US National  
8 Cancer Database [18]. Their study involved 8,703 patients with stage III/IV LC treated between 2003  
9 and 2011 and revealed the decline in total laryngectomies between 2003 and 2007 from 36.0% to  
10 24.6%; in 2008, the utilisation of total laryngectomies increased to 27.8%, and remained within the  
11 range of 26.6% to 31.0% [18]. The use of open partial laryngectomies decreased from a peak  
12 incidence of 17.1% in 2003 and remained stable in the range of 9.0% to 10.4% up to 2011. The data  
13 presented show an evident rise in larynx-preserving CRT from 47% in 2003 to 61.5% in 2011 [18].  
14 The review of Garcia Lorenzo et al. presents another similar comparison of treatment options offered  
15 to patients with T3 and T4 laryngeal cancer over the last 30 years, however from single institution in  
16 Spain [19]. They found out the surgery and RT were progressively substituted by CRT in  
17 chronological periods of 1985-1994, 1995-2004 and 2005-2014. The participation of surgery in  
18 treatment of LC patients declined from 62.5% to 52.2% and 50.5% respectively, while the percentages  
19 for RT were 33.5%, 39.7% and 16.8%, respectively. The contribution of CRT has risen from 0% to  
20 8.1% and 32.7%, respectively. Moreover, the authors showed no significant differences in survival  
21 depending on treatment for T3 cancer patients, however, there was a significantly higher cancer-  
22 specific survival for T4 cancer patients treated surgically. The results of their report revealed the  
23 highest survival for patients from 1995 -2004 period and the lowest survival for those treated in the  
24 period of 2005–2014 [19]. The results of a recent meta-analysis by Tang et al. that include controlled  
25 trials and compare long-term survival, support total laryngectomy for patients with T4 LC and deny  
26 the advantage of primary organ preservation treatment for both T3 and T4 LC in increasing the overall  
27 survival rate [20]. Therefore, a treatment modality for advanced stages of LC should be addressed  
28 especially for further prospective studies. The other reason responsible for declining outcomes of LC  
29 that needs to be considered is the increasing age of patients at the primary diagnosis. With the shift of  
30 the average age, the presence of other comorbidities is also inevitable and may not only influence the  
31 survival but make some patients susceptible to specific therapy options.

32  
33  
34  
35  
36  
37  
38  
39  
40  
41  
42  
43  
44  
45  
46  
47  
48  
49  
50 Regarding the treatment modality for T1 stage of LC in retrospective reports, there is a relative  
51 equivalence of RT and transoral endoscopic microsurgery and the rates of local control exceed 90%  
52 [7]. However for T2 LC the rates decrease significantly and range between 70 and 80%, regardless of  
53 treatment approach [21]. Since the oncological benefits are comparable, both methods are verified in  
54 terms of voice and swallow outcomes, costs, side effects, time consumption, future options. The  
55 technological progress enabled the development of both methods in recent decades. The progress in  
56 visualization techniques and widespread adoption of laser techniques in laryngeal microsurgery  
57  
58  
59  
60

1  
2  
3 contribute to increased numbers of CO<sub>2</sub> laser endoscopic laryngeal resections of cancer, especially  
4 vocal cordectomies. We did not find the data directly analysing the increase in the utility of transoral  
5 procedures performed with the laser compared to cold instruments and open partial laryngectomies in  
6 glottic cancer. However, Mendelsohn et al. identified a substantial annual growth rates and correct  
7 growth rates in original studies covering glottic cancer and laryngeal cancer in the time following the  
8 European Laryngological Society classification of cordectomies in 2000 [22]. Unfortunately, the ICD-  
9 9 classification does not include specification of the 30.22 procedure regarding involvement of laser  
10 versus cold instruments. However according to worldwide trends, we assume that the increase of vocal  
11 cordectomies in Poland is inevitably correlated with widespread CO<sub>2</sub> laser endoscopic laryngeal  
12 microsurgery. The main advantages of laser-assisted LC treatment in comparison to RT are the short  
13 time of therapy, decreased costs, the possibility of revising endoscopic resection in case of persistence  
14 or recurrence and avoidance of the long-term side effects of RT.  
15  
16  
17  
18  
19  
20  
21  
22

23 In parallel to laser cordectomies, the new radiation techniques, including IMRT and stereotactic  
24 radiation therapy, are verified in studies dedicated to early stages of LC with analysis of sufficient  
25 doses (total dose and a single dose/fraction) and addition of sensitising CT [23].  
26  
27

28 There are limitations to our analysis, resulting mainly from the fact that the National Foundation  
29 Database is unfortunately not combined with the National Cancer Registry. Therefore the  
30 identification of LC stage with TNM was not possible due to access to ICD-10 diagnosis solely.  
31 Information concerning locoregional control, metastatic disease, prior or concurrent cancer diagnosis,  
32 received radiation doses, data regarding CT administration with a number of cycles, specific agents,  
33 doses and long-term toxicities is also missing.  
34  
35  
36  
37  
38

### 39 Conclusions

40  
41 The presented data revealed an increase in the total number of organ-preserving treatment modality  
42 with CRT in the subsequent years and a decreasing number of total laryngectomies in Polish patients  
43 with LC. The progressing age of LC onset in Polish population may contribute to declining outcomes.  
44 The multicenter prospective randomised studies comparing treatment modalities should be planned to  
45 verify the oncological outcomes and to refer them to patients' needs and cost-effectiveness.  
46  
47  
48  
49  
50  
51  
52

### 53 Declarations:

54 Authors' contributions: Rzepakowska A. Conceptualization, methodology, writing, reviewing, editing  
55 and visualization. Żurek M: Methodology, data extraction, software and formal analysis, writing –  
56 draft, visualization. Niemczyk K. Reviewing, editing.  
57

58 Conflicts of interest/Competing interests – none declared  
59  
60

1  
2  
3 Funding - This paper has been prepared within the project Maps of Health Needs – Database of  
4 Systemic and Implementation Analyses. The project is co-financed by the European Union from the  
5 European Social Fund under the Operational Program Knowledge Education Development and it is  
6 being carried out by the Analyses and Strategies Department of the Polish Ministry of Health. Grant  
7 number: POWR 05.02.00-00.0149/15-01.

8  
9  
10 Data sharing statement: Deidentified individual participant data that underlie the results are reported in  
11 the article (text, tables, figures and supplementary file).

12  
13  
14 Ethics approval - All data used in the study were de-identified and therefore the approval of the  
15 Institutional Review Board was waived.

16  
17 Patient consent for publication - Not required.

## 20 21 22 References

- 23 1. Global Cancer Observatory, <http://globocan.iarc.fr/Default.aspx>.
- 24 2. Didkowska J, Wojciechowska U, Czaderny K, Olasek P, Ciuba A.: Nowotwory złośliwe w  
25 Polsce w 2017 roku, Polish National Cancer Registry, [http://onkologia.org.pl/wp-](http://onkologia.org.pl/wp-content/uploads/Nowotwory_2017.pdf)  
26 [content/uploads/Nowotwory\\_2017.pdf](http://onkologia.org.pl/wp-content/uploads/Nowotwory_2017.pdf)
- 27 3. Didkowska J, Wojciechowska U, Zatoński W.: Nowotwory złośliwe w Polsce w 2009 roku,  
28 Polish National Cancer Registry [http://onkologia.org.pl/wp-](http://onkologia.org.pl/wp-content/uploads/Nowotwory_2009.pdf)  
29 [content/uploads/Nowotwory\\_2009.pdf](http://onkologia.org.pl/wp-content/uploads/Nowotwory_2009.pdf)
- 30 4. Department of Veterans Affairs Laryngeal Cancer Study Group. Induction chemotherapy plus  
31 radiation compared with surgery plus radiation in patients with advanced laryngeal cancer. *N*  
32 *Engl J Med* 1991;324:1685–90.
- 33 5. Forastiere AA, Goepfert H, Maor M, et al. Concurrent chemotherapy and radiotherapy for  
34 organ preservation in advanced laryngeal cancer. *N Engl J Med* 2003;349:2091–8.
- 35 6. Wick CC, Rezaee RP, Wang T, Garcia-Jarchow AM, Zender CA, Gibson M, Yao M, Lavertu  
36 P. Use of concurrent chemoradiation in advanced staged (T4) laryngeal cancer. *Am J*  
37 *Otolaryngol.* 2017;38(1):72-76.
- 38 7. Baird BJ, Sung CK, Beadle BM, Divi V. Treatment of early-stage laryngeal cancer: A  
39 comparison of treatment options. *Oral Oncol.* 2018 Dec;87:8-16.
- 40 8. The National Health Fund Data. 2018. Available online: <http://www.nfz.gov.pl> (accessed on  
41 20.02.2020).
- 42 9. Central Statistical Office of Poland Data. Available online: <http://www.stat.gov.pl> (accessed  
43 on 20.02.2020).
- 44 10. Olsen KD. Reexamining the treatment of advanced laryngeal cancer. *Head Neck.*2010;32:1–7.
- 45 11. Cosetti M, Yu GP, Schantz SP. Five-year survival rates and time trends of laryngeal cancer in  
46 the US population. *Arch Otolaryngol Head Neck Surg.* 2008;134:370-379.
- 47 12. Netherlands Cancer Registry [Internet]. Laryngeal cancer statistics (2014).  
48 [http://www.dutchcancerfigures.nl/selecties/Dataset\\_3/img54d89aa75777a](http://www.dutchcancerfigures.nl/selecties/Dataset_3/img54d89aa75777a)
- 49 13. SEER Cancer Statistics Factsheets: Larynx Cancer. National Cancer Institute. Bethesda, MD.  
50 <http://seer.cancer.gov/statfacts/html/larynx.html>
- 51 14. NORDCAN: Cancer incidence and mortality in the Nordic countries 2014. [http://www-](http://www-dep.iarc.fr/NORDCAN/english/frame.asp)  
52 [dep.iarc.fr/NORDCAN/english/frame.asp](http://www-dep.iarc.fr/NORDCAN/english/frame.asp)

15. Reizenstein JA, Bergström SN, Holmberg L, Linder A, Ekman S, Blomquist E, Löden B, Holmqvist M, Hellström K, Nilsson CO, Brattström D, Bergqvist M. Impact of age at diagnosis on prognosis and treatment in laryngeal cancer. *Head Neck*. 2010;32:1062-8.
16. Peller M, Katalinic A, Wollenberg B, Teudt IU, Meyer JE. Epidemiology of laryngeal carcinoma in Germany, 1998-2011. *Eur Arch Otorhinolaryngol*. 2016;273:1481-7.
17. Włodarczyk A, Raciborski F, Opoczyńska D, Samoliński B; GATS PWG. Daily tobacco smoking patterns in rural and urban areas of Poland--the results of the GATS study. *Ann Agric Environ Med*. 2013;20(3):588-94
18. Patel SA, Qureshi MM, Dyer MA, Jalisi S, Grillone G, Truong MT. Comparing surgical and nonsurgical larynx-preserving treatments with total laryngectomy for locally advanced laryngeal cancer. *Cancer*. 2019;1;125(19):3367-3377.
19. García Lorenzo J, Montoro Martínez V, Rigo Quera A, Codina Aroca A, López Vilas M, Quer Agustí M, León Vintro X. Modifications in the treatment of advanced laryngeal cancer throughout the last 30 years. *Eur Arch Otorhinolaryngol*. 2017 Sep;274(9):3449-3455.
20. Tang ZX, Gong JL, Wang YH, Li ZH, He Y, Liu YX, Zhou XH. Efficacy comparison between primary total laryngectomy and nonsurgical organ-preservation strategies in treatment of advanced stage laryngeal cancer: A meta-analysis. *Medicine (Baltimore)*. 2018 May;97(21):e10625.
21. Warner L, Lee K, Homer JJ. Transoral laser microsurgery versus radiotherapy for T2 glottic squamous cell carcinoma: a systematic review of local control outcomes. *Clin Otolaryngol* 2017; 42(3): 629–36.
22. Mendelsohn AH, Remacle MJ. Vocal Fold Cancer Transoral Laser Microsurgery Following European Laryngological Society Laser Cordectomy Classification. *Front Oncol*. 2018 Jun 22;8:231.
23. Stokes WA, Abbott D, Phan A, Raben D, Lanning RM, Karam SD. Patterns of Care for Patients With Early-Stage Glottic Cancer Undergoing Definitive Radiation Therapy: A National Cancer Database Analysis. *Int J Radiat Oncol Biol Phys*. 2017;98(5):1014-1021.

#### Figure legends:

Figure 1. Different surgical procedures involving total laryngectomy, partial resection of the larynx or local destruction or excision applied to patients with laryngeal cancer in 2009-2018.

Figure 2. The proportional utilization of surgery, radiotherapy (RT) and chemoradiotherapy (CRT) in treatment of laryngeal cancer in Poland in 2009-2018.





Figure 1. Different surgical procedures involving total laryngectomy, partial resection of the larynx or local destruction or excision applied to patients with laryngeal cancer in 2009-2018.

260x161mm (72 x 72 DPI)



Figure 2. The proportional utilization of surgery, radiotherapy (RT) and chemoradiotherapy (CRT) in treatment of laryngeal cancer in Poland in 2009-2018.

319x201mm (72 x 72 DPI)

Table A. The number of surgical procedures according to ICD 9 codes applied to patients with laryngeal cancer during the 10 year period.

| ICD9/Year                                                                                         | 2009        | 2010        | 2011       | 2012        | 2013       | 2014       | 2015       | 2016       | 2017       | 2018       | Total       |
|---------------------------------------------------------------------------------------------------|-------------|-------------|------------|-------------|------------|------------|------------|------------|------------|------------|-------------|
| <b>Procedures involving total laryngectomies</b>                                                  |             |             |            |             |            |            |            |            |            |            |             |
| 30.3 Complete laryngectomy                                                                        | 4           | 9           | 5          | 6           | 7          | 13         | 24         | 5          | -          | -          | <b>73</b>   |
| 30.31 En bloc laryngeal resection with thyroidectomy and tracheostomy                             | 85          | 70          | 39         | 79          | 48         | 33         | 27         | 20         | 15         | 14         | <b>430</b>  |
| 30.32 Laryngopharyngectomy                                                                        | 521         | 472         | 470        | 517         | 539        | 527        | 559        | 547        | 551        | 531        | <b>5234</b> |
| 30.39 Other complete laryngectomy                                                                 | 347         | 351         | 245        | 303         | 241        | 221        | 202        | 203        | 188        | 153        | <b>2454</b> |
| 30.4 Radical laryngectomy (with radical neck dissection)                                          | 23          | 17          | 8          | 3           | 4          | 6          | 7          | 1          | -          | -          | <b>69</b>   |
| 30.41 Radical laryngectomy (with radical neck dissection) and with thyroidectomy and tracheostomy | 44          | 45          | 31         | 35          | 38         | 45         | 48         | 42         | 39         | 40         | <b>407</b>  |
| 30.49 Other radical laryngectomy                                                                  | 98          | 96          | 115        | 109         | 108        | 113        | 81         | 67         | 70         | 38         | <b>895</b>  |
| <b>Summary</b>                                                                                    | <b>1122</b> | <b>1060</b> | <b>913</b> | <b>1052</b> | <b>985</b> | <b>958</b> | <b>948</b> | <b>885</b> | <b>863</b> | <b>776</b> | <b>9562</b> |
| <b>Procedures involving partial resection of larynx</b>                                           |             |             |            |             |            |            |            |            |            |            |             |
| 30.1 Hemilaryngectomy                                                                             | 42          | 38          | 38         | 25          | 24         | 16         | 16         | 13         | 12         | 13         | <b>237</b>  |
| 30.2 Other partial laryngectomy                                                                   | -           | 3           | 2          | -           | -          | 1          | -          | -          | -          | -          | <b>6</b>    |

|                                                                                   |            |            |            |            |            |            |            |            |            |            |             |
|-----------------------------------------------------------------------------------|------------|------------|------------|------------|------------|------------|------------|------------|------------|------------|-------------|
| 30.21<br>Epiglottidectomy                                                         | 15         | 11         | 7          | 10         | 10         | 6          | 10         | 5          | 1          | 6          | <b>81</b>   |
| 30.22 Vocal<br>cordectomy                                                         | 250        | 276        | 262        | 307        | 249        | 309        | 358        | 369        | 409        | 393        | <b>3182</b> |
| 30.23 Partial<br>laryngectomy with<br>reconstruction                              | 133        | 115        | 94         | 108        | 134        | 93         | 80         | 65         | 57         | 56         | <b>935</b>  |
| 30.24 Laryngeal<br>cartilage resection                                            | 1          | 1          | 1          | 1          | 1          |            | 3          |            | 2          | 2          | <b>12</b>   |
| 30.29 Other partial<br>laryngectomy                                               | 120        | 110        | 120        | 128        | 126        | 152        | 140        | 122        | 101        | 109        | <b>1228</b> |
| <b>Summary</b>                                                                    | <b>561</b> | <b>554</b> | <b>524</b> | <b>579</b> | <b>544</b> | <b>577</b> | <b>607</b> | <b>574</b> | <b>582</b> | <b>579</b> | <b>5681</b> |
| <b>Procedures involving local destruction or excision of laryngeal tissue</b>     |            |            |            |            |            |            |            |            |            |            |             |
| 30.0 Excision or<br>destruction of lesion<br>or tissue of larynx                  | 26         | 6          | 3          | 4          | 1          | 5          | 5          | -          | -          | -          | <b>50</b>   |
| 30.09 Other excision<br>or destruction of<br>lesion or tissue of<br>larynx        | 161        | 167        | 165        | 176        | 151        | 165        | 210        | 167        | 123        | 186        | <b>1671</b> |
| 31.5 Local excision<br>or destruction of<br>larynx lesion or<br>tissue of trachea | 46         | 80         | 61         | 67         | 87         | 135        | 123        | 135        | 104        | 137        | <b>975</b>  |
| <b>Summary</b>                                                                    | <b>233</b> | <b>253</b> | <b>229</b> | <b>247</b> | <b>239</b> | <b>305</b> | <b>338</b> | <b>302</b> | <b>227</b> | <b>323</b> | <b>2696</b> |

STROBE Statement—Checklist of items that should be included in reports of *cohort studies*

|                              | Item No | Recommendation                                                                                                                                                                                                                                                                                                                                                                                                                                                                            |
|------------------------------|---------|-------------------------------------------------------------------------------------------------------------------------------------------------------------------------------------------------------------------------------------------------------------------------------------------------------------------------------------------------------------------------------------------------------------------------------------------------------------------------------------------|
| <b>Title and abstract</b>    | 1       | (a) Indicate the study's design with a commonly used term in the title or the abstract<br>Title page 1<br>(b) Provide in the abstract an informative and balanced summary of what was done and what was found<br>Abstract page 2, results section                                                                                                                                                                                                                                         |
| <b>Introduction</b>          |         |                                                                                                                                                                                                                                                                                                                                                                                                                                                                                           |
| Background/rationale         | 2       | Explain the scientific background and rationale for the investigation being reported<br>Throughout the introduction, page 3                                                                                                                                                                                                                                                                                                                                                               |
| Objectives                   | 3       | State specific objectives, including any prespecified hypotheses<br>The last paragraph of the introduction, page 3                                                                                                                                                                                                                                                                                                                                                                        |
| <b>Methods</b>               |         |                                                                                                                                                                                                                                                                                                                                                                                                                                                                                           |
| Study design                 | 4       | Present key elements of study design early in the paper<br>The last paragraph of the methods section, page 5                                                                                                                                                                                                                                                                                                                                                                              |
| Setting                      | 5       | Describe the setting, locations, and relevant dates, including periods of recruitment, exposure, follow-up, and data collection<br>Second paragraph of the methods section, page 4                                                                                                                                                                                                                                                                                                        |
| Participants                 | 6       | (a) Give the eligibility criteria, and the sources and methods of selection of participants. Describe methods of follow-up<br>Third paragraph of the methods section, page 4<br>(b) For matched studies, give matching criteria and number of exposed and unexposed - not applicable                                                                                                                                                                                                      |
| Variables                    | 7       | Clearly define all outcomes, exposures, predictors, potential confounders, and effect modifiers. Give diagnostic criteria, if applicable<br>Third paragraph of the methods section, page 4                                                                                                                                                                                                                                                                                                |
| Data sources/<br>measurement | 8*      | For each variable of interest, give sources of data and details of methods of assessment (measurement). Describe comparability of assessment methods if there is more than one group - not applicable                                                                                                                                                                                                                                                                                     |
| Bias                         | 9       | Describe any efforts to address potential sources of bias - not applicable                                                                                                                                                                                                                                                                                                                                                                                                                |
| Study size                   | 10      | Explain how the study size was arrived at<br>Second paragraph of the methods section, page 4                                                                                                                                                                                                                                                                                                                                                                                              |
| Quantitative variables       | 11      | Explain how quantitative variables were handled in the analyses. If applicable, describe which groupings were chosen and why<br>Described in statistical analysis subsection, page 5                                                                                                                                                                                                                                                                                                      |
| Statistical methods          | 12      | (a) Describe all statistical methods, including those used to control for confounding<br>Described in statistical analysis subsection, page 5<br>(b) Describe any methods used to examine subgroups and interactions<br>Described in statistical analysis subsection, page 5<br>(c) Explain how missing data were addressed - not applicable<br>(d) If applicable, explain how loss to follow-up was addressed - not applicable<br>(e) Describe any sensitivity analyses - not applicable |
| <b>Results</b>               |         |                                                                                                                                                                                                                                                                                                                                                                                                                                                                                           |
| Participants                 | 13*     | (a) Report numbers of individuals at each stage of study—eg numbers potentially eligible, examined for eligibility, confirmed eligible, included in the study, completing follow-up, and analysed<br>The result section, page 5, table 1.                                                                                                                                                                                                                                                 |

|                          |     |                                                                                                                                                                                                                                                      |
|--------------------------|-----|------------------------------------------------------------------------------------------------------------------------------------------------------------------------------------------------------------------------------------------------------|
|                          |     | (b) Give reasons for non-participation at each stage - not applicable                                                                                                                                                                                |
|                          |     | (c) Consider use of a flow diagram - not applicable                                                                                                                                                                                                  |
| Descriptive data         | 14* | (a) Give characteristics of study participants (eg demographic, clinical, social) and information on exposures and potential confounders<br>Throughout the result section, page 5 -8, table 1, table 2, table 3.                                     |
|                          |     | (b) Indicate number of participants with missing data for each variable of interest - not applicable                                                                                                                                                 |
|                          |     | (c) Summarise follow-up time (eg, average and total amount) - not applicable                                                                                                                                                                         |
| Outcome data             | 15* | Report numbers of outcome events or summary measures over time - not applicable                                                                                                                                                                      |
| Main results             | 16  | (a) Give unadjusted estimates and, if applicable, confounder-adjusted estimates and their precision (eg, 95% confidence interval). Make clear which confounders were adjusted for and why they were included<br>The results section, page 5, table 1 |
|                          |     | (b) Report category boundaries when continuous variables were categorized - not applicable                                                                                                                                                           |
|                          |     | (c) If relevant, consider translating estimates of relative risk into absolute risk for a meaningful time period - not applicable                                                                                                                    |
| Other analyses           | 17  | Report other analyses done—eg analyses of subgroups and interactions, and sensitivity analyses - not applicable                                                                                                                                      |
| <b>Discussion</b>        |     |                                                                                                                                                                                                                                                      |
| Key results              | 18  | Summarise key results with reference to study objectives - page 9                                                                                                                                                                                    |
| Limitations              | 19  | Discuss limitations of the study, taking into account sources of potential bias or imprecision. Discuss both direction and magnitude of any potential bias<br>The last paragraph of the discussion, page 11                                          |
| Interpretation           | 20  | Give a cautious overall interpretation of results considering objectives, limitations, multiplicity of analyses, results from similar studies, and other relevant evidence<br>Throughout the discussion page 9-11                                    |
| Generalisability         | 21  | Discuss the generalisability (external validity) of the study results - not applicable                                                                                                                                                               |
| <b>Other information</b> |     |                                                                                                                                                                                                                                                      |
| Funding                  | 22  | Give the source of funding and the role of the funders for the present study and, if applicable, for the original study on which the present article is based<br>Declarations, page 11-12.                                                           |

\*Give information separately for exposed and unexposed groups.

**Note:** An Explanation and Elaboration article discusses each checklist item and gives methodological background and published examples of transparent reporting. The STROBE checklist is best used in conjunction with this article (freely available on the Web sites of PLoS Medicine at <http://www.plosmedicine.org/>, Annals of Internal Medicine at <http://www.annals.org/>, and Epidemiology at <http://www.epidem.com/>). Information on the STROBE Initiative is available at <http://www.strobe-statement.org>.
