# Supplementary material for: Review of recent treatment trends of laryngeal cancer in Poland: a population-based study
Source: PubMed Central journal article supplement — BMJ Open. 2021 Apr 30;11(4):e045308. doi: 10.1136/bmjopen-2020-045308 (PMC8098998; doi:10.1136/bmjopen-2020-045308), 2021-04-30
Supplement: bmjopen-2020-045308supp001.pdf [file bmjopen-2020-045308supp001.pdf]

Table A. The number of surgical procedures according to ICD 9 codes applied to patients with laryngeal cancer during the 10 year period.

| ICD9/Year                                                                                         | 2009        | 2010        | 2011       | 2012        | 2013       | 2014       | 2015       | 2016       | 2017       | 2018       | Total       |
|---------------------------------------------------------------------------------------------------|-------------|-------------|------------|-------------|------------|------------|------------|------------|------------|------------|-------------|
| <b>Procedures involving total laryngectomies</b>                                                  |             |             |            |             |            |            |            |            |            |            |             |
| 30.3 Complete laryngectomy                                                                        | 4           | 9           | 5          | 6           | 7          | 13         | 24         | 5          | -          | -          | <b>73</b>   |
| 30.31 En bloc laryngeal resection with thyroidectomy and tracheostomy                             | 85          | 70          | 39         | 79          | 48         | 33         | 27         | 20         | 15         | 14         | <b>430</b>  |
| 30.32 Laryngopharyngectomy                                                                        | 521         | 472         | 470        | 517         | 539        | 527        | 559        | 547        | 551        | 531        | <b>5234</b> |
| 30.39 Other complete laryngectomy                                                                 | 347         | 351         | 245        | 303         | 241        | 221        | 202        | 203        | 188        | 153        | <b>2454</b> |
| 30.4 Radical laryngectomy (with radical neck dissection)                                          | 23          | 17          | 8          | 3           | 4          | 6          | 7          | 1          | -          | -          | <b>69</b>   |
| 30.41 Radical laryngectomy (with radical neck dissection) and with thyroidectomy and tracheostomy | 44          | 45          | 31         | 35          | 38         | 45         | 48         | 42         | 39         | 40         | <b>407</b>  |
| 30.49 Other radical laryngectomy                                                                  | 98          | 96          | 115        | 109         | 108        | 113        | 81         | 67         | 70         | 38         | <b>895</b>  |
| <b>Summary</b>                                                                                    | <b>1122</b> | <b>1060</b> | <b>913</b> | <b>1052</b> | <b>985</b> | <b>958</b> | <b>948</b> | <b>885</b> | <b>863</b> | <b>776</b> | <b>9562</b> |
| <b>Procedures involving partial resection of larynx</b>                                           |             |             |            |             |            |            |            |            |            |            |             |
| 30.1 Hemilaryngectomy                                                                             | 42          | 38          | 38         | 25          | 24         | 16         | 16         | 13         | 12         | 13         | <b>237</b>  |
| 30.2 Other partial laryngectomy                                                                   | -           | 3           | 2          | -           | -          | 1          | -          | -          | -          | -          | <b>6</b>    |

|                                                                                   |            |            |            |            |            |            |            |            |            |            |             |
|-----------------------------------------------------------------------------------|------------|------------|------------|------------|------------|------------|------------|------------|------------|------------|-------------|
| 30.21<br>Epiglottidectomy                                                         | 15         | 11         | 7          | 10         | 10         | 6          | 10         | 5          | 1          | 6          | <b>81</b>   |
| 30.22 Vocal<br>cordectomy                                                         | 250        | 276        | 262        | 307        | 249        | 309        | 358        | 369        | 409        | 393        | <b>3182</b> |
| 30.23 Partial<br>laryngectomy with<br>reconstruction                              | 133        | 115        | 94         | 108        | 134        | 93         | 80         | 65         | 57         | 56         | <b>935</b>  |
| 30.24 Laryngeal<br>cartilage resection                                            | 1          | 1          | 1          | 1          | 1          |            | 3          |            | 2          | 2          | <b>12</b>   |
| 30.29 Other partial<br>laryngectomy                                               | 120        | 110        | 120        | 128        | 126        | 152        | 140        | 122        | 101        | 109        | <b>1228</b> |
| <b>Summary</b>                                                                    | <b>561</b> | <b>554</b> | <b>524</b> | <b>579</b> | <b>544</b> | <b>577</b> | <b>607</b> | <b>574</b> | <b>582</b> | <b>579</b> | <b>5681</b> |
| <b>Procedures involving local destruction or excision of laryngeal tissue</b>     |            |            |            |            |            |            |            |            |            |            |             |
| 30.0 Excision or<br>destruction of lesion<br>or tissue of larynx                  | 26         | 6          | 3          | 4          | 1          | 5          | 5          | -          | -          | -          | <b>50</b>   |
| 30.09 Other excision<br>or destruction of<br>lesion or tissue of<br>larynx        | 161        | 167        | 165        | 176        | 151        | 165        | 210        | 167        | 123        | 186        | <b>1671</b> |
| 31.5 Local excision<br>or destruction of<br>larynx lesion or<br>tissue of trachea | 46         | 80         | 61         | 67         | 87         | 135        | 123        | 135        | 104        | 137        | <b>975</b>  |
| <b>Summary</b>                                                                    | <b>233</b> | <b>253</b> | <b>229</b> | <b>247</b> | <b>239</b> | <b>305</b> | <b>338</b> | <b>302</b> | <b>227</b> | <b>323</b> | <b>2696</b> |
